# Supplementary material
Source: PubMed Central journal article supplement (PMC4291623)
Supplement: pnas.1417609112.sapp.pdf [file pnas.1417609112.sapp.pdf]

# 1 Supplemental Information

## 2 Effects of Anthropogenic Emissions on Aerosol Formation from Isoprene and 3 Monoterpenes in the Southeastern United States

4

5 Lu Xu<sup>a</sup>, Hongyu Guo<sup>b</sup>, Christopher M. Boyd<sup>a</sup>, Mitchel Klein<sup>c</sup>, Aikaterini Bougiatioti<sup>b,d</sup>, Kate M. Cerully<sup>a,1</sup>,  
6 James R. Hite<sup>b</sup>, Gabriel Isaacman-VanWertz<sup>e</sup>, Nathan M. Kreisberg<sup>f</sup>, Christoph Knote<sup>g</sup>, Kevin Olson<sup>h</sup>,  
7 Abigail Koss<sup>i,j</sup>, Allen H. Goldstein<sup>e,h</sup>, Susanne V. Hering<sup>f</sup>, Joost de Gouw<sup>i,j</sup>, Karsten Baumann<sup>k</sup>, Shan-Hu  
8 Lee<sup>l</sup>, Athanasios Nenes<sup>a,b,m</sup>, Rodney J. Weber<sup>b</sup>, Nga Lee Ng<sup>a,b,2</sup>

9

10 <sup>a</sup>School of Chemical and Biomolecular Engineering, Georgia Institute of Technology, Atlanta, GA, USA

11 <sup>b</sup>School of Earth and Atmospheric Sciences, Georgia Institute of Technology, Atlanta, GA, USA

12 <sup>c</sup>Rollins School of Public Health, Emory University, Atlanta, GA, USA

13 <sup>d</sup>National Technical University of Athens, Laser Remote Sensing Laboratory, Zografou, Greece

14 <sup>e</sup>Department of Environmental Science, Policy and Management, University of California, Berkeley, CA,  
15 USA

16 <sup>f</sup>Aerosol Dynamics Inc., Berkeley, CA, USA

17 <sup>g</sup>Atmospheric Chemistry Division, National Center for Atmospheric Research, Boulder, CO, USA

18 <sup>h</sup>Department of Civil and Environmental Engineering, University of California, Berkeley, CA, USA

19 <sup>i</sup>NOAA Earth System Research Laboratory, Boulder, CO, USA

20 <sup>j</sup>Cooperative Institute for Research in Environmental Sciences, University of Colorado, Boulder, CO,  
21 USA

22 <sup>k</sup>Atmospheric Research and Analysis Inc., Morrisville, NC, USA

23 <sup>l</sup>Kent State University, College of Public Health, Kent, Ohio, USA

24 <sup>m</sup>Institute of Chemical Engineering Sciences (ICE-HT), Foundation for Research, Patras, Greece.

25

26

27 <sup>1</sup>Present address: TSI, Inc., Shoreview, MN, USA

28 <sup>2</sup>To whom correspondence may be addressed. Nga Lee Ng. Telephone Number: 404-385-2148.

29 Address: 311 Ferst Drive NW, Atlanta, GA, 30332. E-mail: ng@chbe.gatech.edu

## 30 **1. Field Campaign Description**

### 31 **1.1 Southern Oxidant and Aerosol Study (SOAS)**

32 Measurements are performed at the SouthEast Aerosol Research and Characterization  
33 (SEARCH) site in Centreville, Alabama (32.94°N, 87.18°W) on June 1<sup>st</sup> – July 15<sup>th</sup> (2013) as part  
34 of the Southern Oxidant and Aerosol Study (SOAS) field campaign  
35 (<http://soas2013.rutgers.edu/>). A map of the southeastern US with the location of the Centreville  
36 site is shown in Fig. 2 in the main text. The sampling site is surrounded by forests and away from  
37 large urban areas (55km SE and 84 km SW of Tuscaloosa and Birmingham, AL, respectively).  
38 Isoprene is the dominant biogenic volatile organic compound (VOC) with a molar fraction of  
39 82%, and there are also various monoterpenes such as  $\alpha$ -pinene and  $\beta$ -pinene, which account for  
40 8% and 7% of biogenic VOCs, respectively. Temperature during the sampling period typically  
41 peaks at 15:00 (28.6°C) and exhibits a minimum at 05:00 (21.6°C). Relative humidity is greater  
42 than 50% throughout the day and reaches ~90% at night. We define the nighttime as from 20:00  
43 to 05:00 when the solar radiation is zero. Boundary layer height is measured by a ceilometer. The  
44 boundary layer height reaches a daily maximum (1300m) at about 17:00 and a daily minimum  
45 (375m) at about 07:00. The diurnal trends of temperature, relative humidity, and boundary layer  
46 height are shown in Fig. S1.

### 47 **1.2 Southeastern Center for Air Pollution and Epidemiology (SCAPE)**

48 In addition to SOAS, we conducted multiple ambient measurements in the greater Atlanta  
49 area as part of the Southeastern Center for Air Pollution and Epidemiology (SCAPE) study.  
50 SCAPE is an EPA-funded joint research project focusing on the study of air quality and the  
51 health effects of air pollutants. A map of the locations of the SCAPE sites is shown in the Fig. 2  
52 in the main text. In our extensive field studies, four representative sites are chosen in the greater  
53 Atlanta area:

- 54 • Road-side site (RS, 33.775602 N, 84.390957 W): This site is on the Georgia Tech campus and  
55 only 5m away from Interstate 75/85.
- 56 • Georgia Tech site (GT, 33.779125 N, 84.395797 W): This site is located on the rooftop of the  
57 Ford Environmental Science & Technology Building at Georgia Tech, which is approximately  
58 30-40m above ground and 840m away from the road-side site.

59 • Jefferson Street site (JST, 33.777501 N, 84.416667 W): This is a central SEARCH site that is  
60 located in Atlanta's urban area with a mixed commercial and residential neighborhood. It is  
61 about 2000m west of the Georgia Tech site.

62 • Yorkville site (YRK, 33.928528 N, 85.045483 W): This is a central SEARCH site located in a  
63 rural area at about 80km northwest of Jefferson Street site. This site, surrounded by agricultural  
64 land and forests, is characterized by large emissions of biogenic VOCs with occasional influence  
65 of anthropogenic emissions.

66 Our measurements in the greater Atlanta area were conducted from May 2012 to  
67 February 2013, with roughly one month at each site. Details about the sampling period at each  
68 site are listed in Table S1.

## 69 **2. Instrumentation**

70 The major relevant gas-phase and aerosol-phase instrumentations deployed in SOAS and  
71 SCAPE are described in more details in the following sections.

### 72 **2.1 High-Resolution Time-of-Flight Aerosol Mass Spectrometer (HR-ToF-AMS)**

73 An Aerodyne High-Resolution Time-of-Flight Aerosol Mass Spectrometer (HR-ToF-  
74 AMS) was deployed in both SOAS and SCAPE to measure the ambient non-refractory PM<sub>1</sub>  
75 (submicron particulate matter) composition. The working principles of the HR-ToF-AMS have  
76 been explained in detail elsewhere (1, 2). In brief, particles are sampled through an aerodynamic  
77 lens and then transmitted into a detection chamber where particles impact on a hot surface  
78 (600°C). Non-refractory species are flash evaporated and ionized with 70eV electron impact  
79 ionization. The ions generated are extracted into the time-of-flight mass spectrometer. Limited  
80 by the transmission efficiency of the aerodynamic lens, HR-ToF-AMS could only measure  
81 submicron aerosols. The time resolution of our HR-ToF-AMS measurements is set to be 2-3  
82 minutes. The HR-ToF-AMS is operated in two optical modes (V or W) with different resolving  
83 power. W mode has higher resolving power (~4300 at  $m/z$  200) than V mode (~2100 at  $m/z$  200),  
84 but the sensitivity of W mode is lower than V mode. Considering the mass concentration in this  
85 study, only V mode data are reported. Ambient filter measurements (with a particle filter placed  
86 upstream of the instrument) are performed periodically on a daily base in order to correct gas-  
87 phase interference on the particle signals measured by the HR-ToF-AMS. Ionization efficiency

88 (IE) calibrations are conducted every week and the variation in Airbeam/IE is within 20%. A  
89 nafion dryer is placed upstream of the HR-ToF-AMS to ensure that the relative humidity is  
90 below 20% to eliminate potential relative humidity effect on particle collection efficiency (CE)  
91 at the vaporizer. Composition-dependent CE is applied given the presence of large amount of  
92 sulfate (3). The data analysis is performed using the standard AMS analysis toolkits SQUIRREL  
93 v1.53 and PIKA v1.12 in Igor Pro 6.34 (WaveMetrics Inc.). The time series, diurnal trend of  
94 non-refractory species (organics, sulfate, nitrate, ammonium, and chloride) in Centreville, and  
95 normalized mass spectrum of organics as quantified by HR-ToF-AMS are shown in Fig. S2.

## 96 **2.2 Particle Into Liquid Sampler - Ion Chromatograph system (PILS-IC); Particle Into** 97 **Liquid Sampler - Liquid Waveguide Capillary Cell - Total Organic Carbon analyzer** 98 **(PILS-LWCC-TOC)**

99 A Particle Into Liquid Sampler (PILS) is coupled to Ion Chromatograph (IC) to measure  
100 the concentration of water-soluble inorganic compounds (4) in SOAS. From June 1<sup>st</sup> to June 23<sup>rd</sup>  
101 2013, a PM<sub>2.5</sub> cyclone is placed upstream of the PILS-IC. On June 24<sup>th</sup>, we replaced the PM<sub>2.5</sub>  
102 cyclone with a PM<sub>1</sub> cyclone. To be consistent with the particle size range detected by HR-ToF-  
103 AMS (i.e., PM<sub>1</sub>), only PILS-IC data after June 24<sup>th</sup> 2013 are reported in this study.

104 A second PILS is coupled to a Liquid Waveguide Capillary Cell - Total Organic Carbon  
105 analyzer (LWCC-TOC) system to continuously measure the concentration of water-soluble  
106 brown carbon. Detailed description of this instrument can be found in Hecobian et al. (5). Briefly,  
107 PILS dissolves water-soluble species from the sample flow and the liquid sample coming out of  
108 the PILS is continuously injected into a Liquid Waveguide Capillary Cell via a syringe pump.  
109 Absorption spectra are collected over a range of wavelengths (200-800 nm), based on which the  
110 absorption of water soluble carbon at 365nm is calculated.

## 111 **2.3 Thermal Desorption Aerosol Gas Chromatography Instrument (TAG)**

112 Particle-phase concentrations of 2-methylerythritol and 2-methylthreitol (collectively  
113 referred to as methyltetrols) and levoglucosan are measured hourly using a Semi-Volatile  
114 Thermal desorption Aerosol Gas chromatograph (SV-TAG), modified to include in-situ  
115 derivatization of oxygenated tracers. This instrument is described in detail by Isaacman et al. (6).  
116 Briefly, sample is collected at 10 SLPM into two parallel custom collection and thermal  
117 desorption cells, each consisting of a high surface area metal fiber filter in a custom thermally

118 controlled stainless steel housing that quantitatively collects particle- and gas-phase compounds  
119 with a vapor pressure as high as tetradecane (7). Sample collected in one of the two cells is  
120 passed through a 16-inch-long multi-channel carbon monolith (MAST carbon: 500 channel, 30  
121 mm diameter) to remove all gas-phase compounds, while a simultaneous unperturbed sample is  
122 collected in the other cell. Though total gas-plus-particle-phase concentrations and direct  
123 measurements of fraction in the particle phase are also accessible using these parallel cells, only  
124 particle-phase concentrations are used for comparisons in this work to allow direct comparison to  
125 PMF factors from HR-ToF-AMS data.

126 Samples are transferred from the collection cell to the head of a gas chromatography  
127 column in a two-step thermal desorption cycle with a temperature ramp from 30°C to 315°C and  
128 an intermediate purge-and-trap on a custom pre-concentration trap as described by Zhao et al. (7).  
129 Desorption helium is saturated with a silylating agent, converting hydroxyl groups, which cannot  
130 be effectively analyzed by gas chromatography, into less-polar trimethylsilyl esters and ethers.  
131 Compounds are separated and analyzed with a non-polar chromatography column (Rxi-5Sil MS:  
132 20m x 0.15 mm x 0.15  $\mu\text{m}$ ; Restek Corporation) in a custom-modified gas chromatograph/mass  
133 spectrometer (7890/5975C; Agilent Technologies). Collection cells are isolated from the gas  
134 chromatograph using a custom valveless interface (8) to allow simultaneous sample collection  
135 and analysis, allowing hourly time resolution (with 22 minutes of sample collection in each hour,  
136 under typical operating conditions).

#### 137 **2.4 Gas Chromatography - Mass Spectrometry (GC-MS)**

138 Volatile organic compounds (VOCs) having 1 to 12 carbon atoms ( $\text{C}_1\text{-C}_{12}$ ) are measured  
139 by gas-chromatography mass-spectrometry (GC-MS) (9). The detection limit, precision, and  
140 accuracy vary slightly between compounds but are generally about 10pptv, 15%, and 25%,  
141 respectively. The inlet for the GC-MS consists of an unheated 30m Teflon line and samples from  
142 approximately 20m above ground level. Ambient air is pumped through the inlet at  
143 approximately 5 SLPM. Two smaller streams (Channel 1 and Channel 2) of 70 sccm each are  
144 subsampled horizontally off the main inlet. Channel 1 analyzes  $\text{C}_2\text{-C}_5$  hydrocarbons. Channel 2  
145 analyzes  $\text{C}_5\text{-C}_{12}$  hydrocarbons and hetero-atom containing compounds. Channel 1 sample passes  
146 through a trap consisting of Ascarite (Thomas Scientific) to remove water and  $\text{CO}_2$ . Channel 2  
147 sample passes through a trap containing granular  $\text{Na}_2\text{SO}_3$  (Fisher Scientific) to remove ozone.

148 Both sample streams then pass through a cryogenically cooled (-35°C) trap to further remove  
149 water. Sample streams are then directed into cryogenic traps at -165°C for five minutes every  
150 half hour. After the five minute sampling period, the Channel 1 cryogenic trap is flash heated  
151 from -165°C to 100°C. The sample is briefly cryofocused then injected onto an 18m Al<sub>2</sub>O<sub>3</sub>/KCl  
152 PLOT column, which is ramped from 55°C to 150°C in 3.5 minutes. The Channel 2 cryogenic  
153 trap is then flash heated and sample is injected onto a 20m DB-624 column, which is ramped  
154 from 38°C to 130°C in 11 minutes. Column eluent is ionized with electron ionization (EI) and  
155 analyzed by a linear quadrupole mass spectrometer (Agilent 5973) operating in selected ion  
156 mode.

### 157 **3. Positive Matrix Factorization (PMF)**

158 Positive Matrix Factorization (PMF) (10, 11) is a multivariate factor analysis technique.  
159 PMF analysis represents the observed data as the linear combination of a number of factors with  
160 constant source profiles (mass spectrum for HR-ToF-AMS data) but varying concentration  
161 contributions across the dataset. Specifically, PMF solves the bilinear factor model

$$162 \quad x_{ij} = \sum_p g_{ip} f_{pj} + e_{ij} \quad \text{Eqn 1}$$

163 where  $x_{ij}$  is the measured values of  $j$  species in  $i$  sample,  $p$  is the number of factors,  $f_{pj}$  is the  
164 fraction of  $j$  species in the source profile of certain factor,  $g_{ip}$  is the contribution of certain factor  
165 in  $i$  sample,  $e_{ij}$  is the residual of  $j$  species in  $i$  sample, by minimizing the summed least squares  
166 errors of the fit weighted with the error estimates of each sample. PMF analysis requires no  
167 priori assumption and constrains solution to have non-negative values, which provides more  
168 physically meaningful solutions than other receptor models.

169 PMF analysis is performed on high-resolution mass spectra of organic species (nitrate  
170 and sulfate functional groups are not included) for source apportionments. Organic data matrix  
171 and error matrix are generated from PIKA v1.12. The PMF Evaluation Toolkit (PET) software is  
172 utilized to process the data (12). Any “weak”  $m/z$ 's (whose signal-to-noise ratio ranges between  
173 0.2 and 2) are downweighted by a factor of 2, and “bad”  $m/z$ 's (whose signal-to-noise ratio is  
174 smaller than 0.2) are removed to reduce disproportionate effects on the results (13). Four organic  
175 ions ( $O^+$ ,  $HO^+$ ,  $H_2O^+$ , and  $CO^+$ ), which are scaled to  $CO_2^+$  in PIKA v1.12, are downweighted  
176 prior to PMF analysis to avoid excessive weighting of  $CO_2^+$ . The error of  $CHO^+$  ( $m/z$  29.0027) is

177 downweighted by a factor of 4 as its error appears to be underestimated, possibly due to  
178 interference from its adjacent  $N_2$  isotope ion ( $m/z$  29.0032). PMF solutions for Centreville and all  
179 SCAPE datasets are evaluated by following the detailed procedure listed in Zhang et al. (14). For  
180 simplicity, we only show the key diagnostic plots of the PMF results for the Centreville data in  
181 Fig. S3.

182 For the Centreville data, a 4-factor solution is chosen after carefully checking the quality  
183 of the fit parameter ( $Q/Q_{\text{exp}}$ ). Solutions with more than 4 factors display splitting behavior of  
184 existing factors instead of providing new factors (12). The rotational ambiguity of the 4-factor  
185 solution is examined by varying the FPEAK parameter. We do not find improved correlations  
186 with external tracers for FPEAK values that are different from 0. Therefore, a FPEAK value of 0  
187 is selected for the solution. For the 4-factor solution with FPEAK=0, the scaled residual of each  
188  $m/z$  is relatively uniformly distributed (panel (e) in Fig. S3) and the reconstructed organic aerosol  
189 concentration agrees well with measurement (panel (f) in Fig.S3). Combing the key diagnostic  
190 plots and PMF solutions with characteristic mass spectral signature, diurnal pattern, and  
191 correlation with external tracers (shown in the main text), we find the 4-factor solution with  
192 FPEAK=0 to be the most reasonable and meaningful solution.

193 Various factors are identified in Centreville and SCAPE datasets. In this study, we focus  
194 on the effects of anthropogenic emissions on biogenic SOA, including the isoprene-derived OA  
195 (Isoprene-OA) and less-oxidized oxygenated OA (LO-OOA). The identification of Isoprene-OA,  
196 LO-OOA, more-oxidized oxygenated organic aerosol (MO-OOA), and biomass burning OA  
197 (BBOA) are discussed in the main text. It is important to note that the BBOA and Isoprene-OA  
198 reported in this study likely only represent fresh OA from biomass burning and isoprene  
199 oxidation, respectively. Recent laboratory studies (15, 16) revealed that the oxidation of  
200 levoglucosan is fast in both gas phase and aqueous phase. The fast oxidation of levoglucosan can  
201 result in the rapid decay of signals at  $C_2H_4O_2^+$  ( $m/z$  60) and  $C_3H_5O_2^+$  ( $m/z$  73), causing the mass  
202 spectrum of BBOA to resemble that of MO-OOA (17). Thus, the aged OA from biomass burning  
203 could be apportioned to MO-OOA factor. It is possible that Isoprene-OA would lose its signature  
204 ( $C_4H_5^+$  and  $C_5H_6O^+$ ) in the mass spectrum during aging as well, though currently there are no  
205 data reported in terms of how fast this process occurs in the atmosphere. Taken together, the

206 mass fractions of the BBOA and Isoprene-OA factors likely serve as a lower bound of OA from  
207 biomass burning and isoprene photooxidation.

208 Here, we briefly discuss the identification of cooking OA (COA) and hydrocarbon-like  
209 OA (HOA), which are also important OA sources for several datasets shown in Fig.2.  
210 Hydrocarbon-like organic aerosol (HOA) is a surrogate of primary OA from vehicle emissions  
211 (14). Among all the OA factors, HOA is the least oxidized and its mass spectrum is dominant by  
212 hydrocarbon-like ions ( $C_xH_y^+$  ions), which is similar to the mass spectrum of primary  
213 combustion emission species (14). In addition, HOA is only identified in urban sites (Roadside  
214 site, Georgia Tech site, and Jefferson Street site), which is consistent with the lower  
215 anthropogenic emissions in rural sites. HOA shows clear diurnal pattern with evident morning  
216 and evening rush hour peaks.

217 Cooking OA (COA) is identified in urban sites throughout the year. The mass spectrum  
218 of this factor is characterized by prominent signal at ion  $C_3H_5^+$  ( $m/z$  41) and  $C_4H_7^+$  ( $m/z$  55),  
219 which is similar to the mass spectrum of unsaturated fatty acids (18, 19). COA has a clear and  
220 unique diurnal trend, which shows a small peak at lunch time and a large peak at dinner time. In  
221 addition to Atlanta, the COA factor has also been detected in megacities all over the world (18,  
222 20-22), indicating cooking is an important source for OA in urban areas.

223 Elemental ratios (O:C, H:C, N:C, and OM:OC) of PMF factors are determined by  
224 following the procedure in Canagaratna et al. (23). Since nitrate functional groups ( $NO^+$  and  
225  $NO_2^+$  ions) of organic compounds are excluded in PMF analysis,  $NO^+$  and  $NO_2^+$  ion are not  
226 included in N:C calculation.

#### 227 4. Multivariate Linear Regression

228 Our multivariate linear regression equation takes the following form:

$$229 \text{ [Isoprene-OA]} = \beta_0 + \beta_1 \times [\text{H}_2\text{O}_{\text{ptcl}}] + \beta_2 \times \text{H}^+_{(\text{aq})} + \beta_3 \times [\text{SO}_4^{2-}] + \sum_{i=0}^{23} \alpha_i \times \text{hour}_i \quad \text{Eqn 2}$$

230 The dependent variable is the concentration of Isoprene-OA factor and the explanatory variables  
231 are particle water content ( $[\text{H}_2\text{O}_{\text{ptcl}}]$ ,  $\mu\text{g m}^{-3}$  air), particle acidity ( $\text{H}^+_{(\text{aq})}$ ,  $\text{mol L}^{-1}$   $\text{H}_2\text{O}$ ), sulfate  
232 ( $[\text{SO}_4^{2-}]$ ,  $\mu\text{g m}^{-3}$  air) as well as 24 hour-of-day indicator variables capturing the diurnal variation



233 of Isoprene-OA. The 24 hour-of-day indicator variables are included in this regression analysis  
234 in order to account for the diurnal variation of Isoprene-OA. For example, the interpretation of  $\beta$ -  
235 coefficient of sulfate is the effect of sulfate on Isoprene-OA at the same hour of day and holding  
236  $[\text{H}_2\text{O}_{\text{ptcl}}]$  and  $\text{H}^+_{(\text{aq})}$  constant. If the indicator variables are not included, we cannot rule out the  
237 possibility that the association between Isoprene-OA and sulfate is caused by the fact that they  
238 have similar diurnal trends.

239 Details regarding the calculation and uncertainty of particle water content and particle  
240 acidity can be found in Guo et al. (24). Briefly, we calculate the particle water content by  
241 including water uptake by both inorganics and organics. Water uptake by inorganics is calculated  
242 from the thermodynamic model ISORROPIA II (25) by including  $\text{SO}_4^{2-}$ ,  $\text{NH}_4^+$ ,  $\text{NO}_3^-$ ,  $\text{Cl}^-$ ,  $\text{Na}^+$ ,  
243  $\text{Ca}^{2+}$ ,  $\text{Mg}^{2+}$ , and  $\text{K}^+$  as well as gas-phase  $\text{NH}_3$ . In Centreville, the concentrations of all inorganic  
244 ions are from PILS-IC measurements. In SCAPE datasets, only  $\text{SO}_4^{2-}$ ,  $\text{NH}_4^+$ ,  $\text{NO}_3^-$  and  $\text{Cl}^-$  are  
245 included and they are from HR-ToF-AMS measurements, since PILS-IC was not deployed in the  
246 SCAPE study. Water uptake by organics is calculated based on the measured concentration and  
247 hygroscopicity of organics. Organic concentration is measured by the HR-ToF-AMS. Organic  
248 hygroscopicity is inferred from total measured hygroscopicity via Cloud Condensation Nuclei  
249 counter (CCN) by subtracting the contribution from inorganic species (26). Water uptake by  
250 organics contributes to 36% of total water in SOAS. The calculated  $[\text{H}_2\text{O}_{\text{ptcl}}]$  agrees with our  
251 indirect measurements of particle water content (24). Further, particle acidity ( $\text{H}^+_{(\text{aq})}$ ,  $\text{mol L}^{-1}$   
252  $\text{H}_2\text{O}$ ) is calculated based on  $[\text{H}_2\text{O}_{\text{ptcl}}]$  and output  $[\text{H}^+]$  ( $\mu\text{g m}^{-3}$  air) from ISORROPIA II. The  
253 ISORROPIA equilibrium calculations accurately predict the measured gas-phase ammonia  
254 concentration (24), providing strong validation for our particle acidity calculation.

255 We use SAS (version 9.4; SAS Institute Inc., Cary, NC) for all of our statistical analyses.  
256 For the Centreville data, a total of 615 data points (one hour average data) are included in the  
257 model. The significance of the 24 indicator variables is tested as a group. We find a statistically  
258 significant ( $p=0.0001$ ) positive linear relationship between indicator variables and Isoprene-OA,  
259 indicating that the indicator variables can capture the diurnal variation of Isoprene-OA.

## 260 **5. Effects of Particle Water ( $\text{H}_2\text{O}_{\text{ptcl}}$ ), Particle Acidity ( $\text{H}^+$ ), and Sulfate ( $\text{SO}_4^{2-}$ ) on Isoprene-** 261 **OA Factor for SCAPE Datasets**

262 Fig. S6 shows  $\text{H}^+_{(\text{aq})}$  ( $\text{mol L}^{-1} \text{H}_2\text{O}$ ) as a function of  $[\text{H}_2\text{O}_{\text{ptcl}}]$  ( $\mu\text{g m}^{-3}$  air) for Centreville,  
263 Jefferson Street (JST\_May), Yorkville (YRK\_July), and Georgia Tech (GT\_Aug), where the  
264 Isoprene-OA factor is resolved. For each site, all data points are grouped into nine subplots based  
265 on sulfate concentration. An increment of 0.5, 0.5, 0.8, and 0.8  $\mu\text{g m}^{-3}$  in  $[\text{SO}_4^{2-}]$  is chosen for  
266 Centreville, JST\_May, YRK\_July, and GT\_Aug, respectively, in order to evenly distribute the  
267 data points into nine subplots. The size of data points represents the concentration of Isoprene-  
268 OA. The maximum concentration of the Isoprene-OA factor is 5.3, 1.9, 11.1, 6.9  $\mu\text{g m}^{-3}$  for  
269 Centreville, JST\_May, YRK\_July, and GT\_Aug, respectively.

270 As mentioned in the Fig. 3B of main text, a range of  $\text{H}^+_{(\text{aq})}$  is observed for the same  
271  $[\text{H}_2\text{O}_{\text{ptcl}}]$  in Centreville, which is likely due to difference in gas-phase  $[\text{NH}_3]$ . As shown in Fig.  
272 S6(a),  $\text{H}^+_{(\text{aq})}$  is lower when gas-phase  $[\text{NH}_3]$  is higher under similar  $[\text{H}_2\text{O}_{\text{ptcl}}]$ . In contrast, only a  
273 narrow range of  $\text{H}^+_{(\text{aq})}$  is obtained for the same  $[\text{H}_2\text{O}_{\text{ptcl}}]$  in SCAPE datasets because  $[\text{NH}_3]$  data  
274 are not available and thus not included in the  $\text{H}^+_{(\text{aq})}$  calculation.

## 275 **6. Backtrajectory Analysis**

276 Backtrajectories have been calculated every 3 hours with the Lagrangian particle dispersion  
277 model (FLEXPART) (27) in version 9.02 (<http://flexpart.eu>) using 6-hourly meteorological  
278 analysis data of the Global Forecasting System (GFS) of the National Centers for Environmental  
279 Prediction (NCEP) ([http://nomads.ncep.noaa.gov/txt\\_descriptions/GFS\\_half\\_degree\\_doc.shtml](http://nomads.ncep.noaa.gov/txt_descriptions/GFS_half_degree_doc.shtml)),  
280 interlaced with 3 hour forecasts (0, 3, 6, 9, 12, 15, 18, 21 UTC), at a horizontal resolution of  $0.5^\circ$ .  
281 400,000 particles are released randomly within the first three hours of a simulation from the  
282 location of the Centreville site and followed back in time for 72 hours. We here consider  
283 ‘particle’ to refer to an infinitesimally small parcel of air, an inert ‘air mass tracer’, that is only  
284 affected by three-dimensional transport, turbulence and convection, but does not have any  
285 removal processes (no deposition, sedimentation, or chemical loss). Particle residence times,  
286 i.e., the concentration of particles times the time spent in a given grid cell, are then integrated  
287 over the simulation period to derive fractional contributions of each sector to the air mass history.

288 To examine if the diurnal trend of LO-OOA in Centreville varies with different origins of  
289 air mass, we split the field into four quadrants relative to the measurement location of Centreville:  
290 northwesterly (NW), northeasterly (NE), southwesterly (SW), and southeasterly (SE). Then we  
291 assign each backtrajectory (3hr period) an origin based on the quadrant with the largest residence  
292 time. For example, if 60% of one backtrajectory stays in the northwestern quadrant, we assign  
293 this backtrajectory to NW. Following this procedure, 348 backtrajectories are assigned into four  
294 groups: NW (156), NE (21), SW (120), SE (51). Fig. S9 shows the integrated backtrajectory  
295 residence time of four quadrants. Further, the LO-OOA data (time step = 2-3 min) are averaged  
296 into 3hr time resolution in order to match the time step of the backtrajectory. According to the  
297 origin of the corresponding backtrajectory, LO-OOA is also categorized into four groups. Fig.  
298 S10 (a) shows the grouped diurnal trend of LO-OOA based on the origin of the air masses. LO-  
299 OOA concentration is higher at night than in the day regardless of the origins of the air masses,  
300 indicating that LO-OOA has a local source. We note that when the air mass comes from the NE  
301 and SE, the LO-OOA diurnal trend shows a relatively larger variability due to lower frequency  
302 of air mass originating from these two quadrants.

303 The same backtrajectory analysis has also been performed for Isoprene-OA factor.  
304 Isoprene-OA also shows a similar diurnal pattern (peaks in late afternoon) regardless of the  
305 origins of the air masses as shown in Fig. S10(c). This suggests that the source of Isoprene-OA is  
306 local.

## 307 7. Organic Nitrate Estimation

308 The mass concentration of the nitrate functional groups (-ONO<sub>2</sub> subunit) in organic  
309 compounds is estimated based on the difference between HR-ToF-AMS measurements and  
310 PILS-IC measurements (4). While PILS-IC measures -ONO<sub>2</sub> from inorganic nitrate only, HR-  
311 ToF-AMS could measure -ONO<sub>2</sub> from both organic and inorganic nitrates. Unlike PILS-IC,  
312 which directly measures the concentration of -ONO<sub>2</sub> subunit, HR-ToF-AMS has extensive  
313 fragmentation caused by strong electron impact ionization. Thus, -ONO<sub>2</sub> subunit appears mostly  
314 as NO<sub>x</sub><sup>+</sup> ions (NO<sup>+</sup> and NO<sub>2</sub><sup>+</sup>) in HR-ToF-AMS (28). In this study, we use the concentration of  
315 NO<sup>+</sup> and NO<sub>2</sub><sup>+</sup> to estimate the concentration of -ONO<sub>2</sub> for HR-ToF-AMS following Eqn 3, in  
316 which 30, 46, and 62 are the molecular weights of NO<sup>+</sup>, NO<sub>2</sub><sup>+</sup>, and -ONO<sub>2</sub>, respectively.

$$317 \quad [-\text{ONO}_2]_{\text{AMS}} = [\text{NO}^+] \times \frac{62}{30} + [\text{NO}_2^+] \times \frac{62}{46} \quad \text{Eqn 3}$$

318           The mass concentration of nitrate functional groups in organic compounds ( $[-\text{ONO}_2]_{\text{org}}$ )  
 319 is used to estimate the mass concentration of organic nitrates according to Eqn 4.  $\text{MW}_{\text{ON}}$  is the  
 320 average molecular weight of organic nitrates, which is assumed to range from 200 to 300  $\text{g mol}^{-1}$   
 321 according to Rollins et al. (29). Fig. S11. shows the diurnal trends of organic nitrates  
 322 contribution to LO-OOA.

$$323 \quad [\text{ON}] = \frac{[-\text{ONO}_2]_{\text{org}}}{62} \times \text{MW}_{\text{ON}} \quad \text{Eqn 4}$$

324

### 325 **8. $[\text{NO}_3^*]$ Estimation**

326           In SOAS, the reactive loss of  $\text{NO}_3^*$  is much larger than the sinks of  $\text{N}_2\text{O}_5$  (homogeneous  
 327 reaction with water and heterogeneous uptake to particles) as shown below.

328           The  $\text{NO}_3^*$  lifetime with respect to reaction with biogenic VOCs ( $\tau_{\text{NO}_3, \text{BVOCs}}$ ) is

$$329 \quad \tau_{\text{NO}_3, \text{BVOCs}} = \frac{1}{\sum k_i [\text{VOC}_i]}$$

330           In Centreville, a suite of VOCs is measured with Gas-Chromatography Mass-  
 331 Spectrometer (GC-MS). Using the campaign-average nighttime concentrations of the VOCs and  
 332 the reaction rate constants of  $\text{VOCs} + \text{NO}_3^*$  at typical nighttime temperature (25°C), as listed in  
 333 Table S3, results in a  $\tau_{\text{NO}_3, \text{BVOCs}}$  value of 8s.

334           The  $\text{N}_2\text{O}_5$  lifetime with respect to heterogeneous uptake onto aqueous particles ( $\tau_{\text{N}_2\text{O}_5, \text{het}}$ ) is

$$335 \quad \tau_{\text{N}_2\text{O}_5, \text{het}} = \frac{1}{k_{\text{het}}},$$

336 in which  $k_{\text{het}}$  is the rate for heterogeneous uptake. According to Fry et al. (30),

$$337 \quad k_{\text{het}} = \frac{\gamma V}{4} SA,$$

338 in which  $\gamma$  is the uptake coefficient,  $v$  is the molecular speed, and SA is the surface area of  
 339 particles. By using 1)  $\gamma = 0.045$  (upper limit for  $\text{N}_2\text{O}_5$  uptake to particle with different  
 340 composition according to Gaston et al. (31)); 2)  $v = 2.3 \times 10^4 \text{ cm s}^{-1}$  according to Fry et al. (30);  
 341 and 3) average  $\text{SA} = 200 \mu\text{m}^2 \text{ cm}^{-3}$ , we calculate that  $\tau_{\text{N}_2\text{O}_5, \text{het}}$  is about 1900s.

342 The  $\text{N}_2\text{O}_5$  lifetime with respect to reaction with  $\text{H}_2\text{O}$  ( $\tau_{\text{N}_2\text{O}_5, \text{H}_2\text{O}}$ ) according to Crowley et  
 343 al. (32) is

$$344 \quad \tau_{\text{N}_2\text{O}_5, \text{H}_2\text{O}} = \frac{1}{k_{\text{H}_2\text{O}}} = \frac{1}{2.5 \times 10^{-22} [\text{H}_2\text{O}] + 1.8 \times 10^{-39} [\text{H}_2\text{O}]^2},$$

345 in which  $k_{\text{H}_2\text{O}}$  is the reaction rate of  $\text{N}_2\text{O}_5$  and  $\text{H}_2\text{O}$ ,  $[\text{H}_2\text{O}]$  is the water concentration in the unit  
 346 of molecule  $\text{cm}^{-3}$ .  $[\text{H}_2\text{O}]$  reaches a daily maximum of  $\sim 10 \mu\text{g m}^{-3}$  ( $\sim 3.3 \times 10^{11}$  molecule  $\text{cm}^{-3}$ ) at  
 347 around 7am. Using  $[\text{H}_2\text{O}] = \sim 3.3 \times 10^{11}$  molecule  $\text{cm}^{-3}$  results in a  $\tau_{\text{N}_2\text{O}_5, \text{H}_2\text{O}}$  value of  $1.2 \times 10^{10}$  s.

348 In conclusion, the lifetime of  $\text{NO}_3^\bullet$  with respect to reaction with BVOCs (8s) is much  
 349 shorter than the lifetime of  $\text{N}_2\text{O}_5$  with respect to heterogeneous uptake (1900s) and homogeneous  
 350 reaction with  $\text{H}_2\text{O}$  ( $1.2 \times 10^{10}$ s).

351 Therefore, we could estimate  $[\text{NO}_3^\bullet]$  based on that the production mechanism for  $\text{NO}_3^\bullet$  at  
 352 night is the reaction of  $\text{NO}_2$  with  $\text{O}_3$  and the major loss mechanism for  $\text{NO}_3^\bullet$  is its reaction with  
 353 VOCs (Eqn 5).

$$354 \quad \frac{d[\text{NO}_3^\bullet]}{dt} = k_1 [\text{O}_3] \times [\text{NO}_2] - \left( \sum k_i [\text{VOC}_i] \right) \times [\text{NO}_3^\bullet] \quad \text{Eqn 5}$$

355 Due to the estimated high reactivity of  $\text{NO}_3^\bullet$  (8s), we can assume  $\text{NO}_3^\bullet$  is at steady state.  
 356 With this, we can express  $[\text{NO}_3^\bullet]$  as:

$$357 \quad [\text{NO}_3^\bullet] = \frac{k_1 [\text{O}_3] [\text{NO}_2]}{\sum k_i [\text{VOC}_i]} \quad \text{Eqn 6}$$

358 The average nighttime  $[\text{O}_3]$  and  $[\text{NO}_2]$  are 21ppb and 0.54ppb, respectively. Using the  
 359 concentration of each species and  $k_1 = 3.52 \times 10^{-17} \text{ cm}^3 \text{ molec}^{-1} \text{ s}^{-1}$  (from Master Chemical

360 Mechanism via website <http://mcm.leeds.ac.uk/MCM/>, under 25°C) (33), the [NO<sub>3</sub>•] is calculated  
361 to be 7.6×10<sup>-2</sup> ppt.

## 362 9. Laboratory Chamber Experiments

363 The secondary organic aerosol (SOA) yields from β-pinene oxidation by NO<sub>3</sub>• radical  
364 under similar conditions (mass loading, temperature, relative humidity, aerosol acidity, and RO<sub>2</sub>  
365 fate) as Centreville are measured in the Georgia Tech Environmental Chamber facility (GTEC).  
366 Prior to each experiment, the 12 m<sup>3</sup> Teflon chambers are continuously flushed for 24 hours with  
367 purified air (AADCO pure air generator). All experiments are conducted at 25°C. NO<sub>2</sub> and O<sub>3</sub>  
368 are injected separately and then mixed in the chamber. The reaction of NO<sub>2</sub> with O<sub>3</sub> could form  
369 NO<sub>3</sub>• through the reaction R1. NO<sub>2</sub> and O<sub>3</sub> concentrations are chosen ([NO<sub>2</sub>]:[O<sub>3</sub>] ≈ 4:3, molar  
370 ratio) to ensure that 99% of the β-pinene is oxidized by NO<sub>3</sub>• instead of ozone. In order to ensure  
371 that the majority of RO<sub>2</sub>• reacts with HO<sub>2</sub>• instead of RO<sub>2</sub>•, which is likely the fate of RO<sub>2</sub>• at  
372 night in the southeastern US (34), formaldehyde is injected into chamber by passing pure air over  
373 formalin solution (Sigma-Aldrich, 37% HCHO) in a glass bulb. The reaction of formaldehyde  
374 and NO<sub>3</sub>• can generate HO<sub>2</sub>• through the reaction R2. A systematic set of experiments is carried  
375 out for a range of initial β-pinene mixing ratios (3-15ppb) under both dry (RH<2%) and humid  
376 (RH ~70%) conditions with acidic seed particles (ammonium sulfate/sulfuric acid mixture,  
377 (NH<sub>4</sub>)<sub>2</sub>SO<sub>4</sub>:H<sub>2</sub>SO<sub>4</sub> = 3:5, molar ratio).

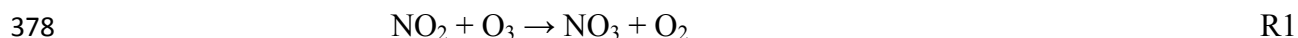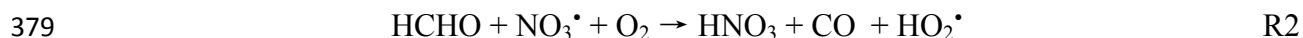

380 High Resolution Time-of-Flight Aerosol Mass Spectrometer (HR-ToF-AMS) and Scanning  
381 Mobility Particle Sizer (SMPS) are used to characterize aerosol growth and particle-phase  
382 composition. The gas-phase compositions are monitored with Chemical Ionization Mass  
383 Spectrometer (CIMS), ozone, and NO<sub>x</sub> monitors. The SOA yield is found to range from 0.32 to  
384 0.64, which depends on aerosol mass loading. Specifically, the SOA yield under conditions that  
385 are similar to Centreville (i.e., mass loading, temperature, relative humidity, aerosol acidity, and  
386 RO<sub>2</sub> fate) is 0.50.

387

## 388 10. Estimation of Contributions from Different VOCs to LO-OOA

389 To provide observational constraints on the contribution of  $\text{NO}_3^\bullet$  chemistry to LO-OOA,  
390 we estimate aerosol formation from isoprene,  $\alpha$ -pinene, and  $\beta$ -pinene, which are the most  
391 abundant SOA precursors measured in Centreville, via various oxidation pathways. At night, the  
392 main oxidants are  $\text{NO}_3^\bullet$  radicals and ozone. Based on the oxidant concentration (measured  $[\text{O}_3]$   
393 21ppb and estimated  $[\text{NO}_3^\bullet]$   $7.6 \times 10^{-2}$  ppt) and the reaction rate constant of each BVOC with  $\text{O}_3$   
394 and  $\text{NO}_3^\bullet$ , we can estimate the branching ratio of each BVOC that reacts with  $\text{NO}_3^\bullet$  (Eqn 7). We  
395 calculate that 17%, 20%, and 38% of isoprene,  $\alpha$ -pinene, and  $\beta$ -pinene, respectively, reacts with  
396  $\text{NO}_3^\bullet$  at night (Table S5).

$$397 \text{ branching ratio}_{\text{species i}+\text{NO}_3^\bullet} = \frac{k_{[\text{species i}+\text{NO}_3]} \times [\text{NO}_3^\bullet]}{k_{[\text{species i}+\text{NO}_3]} \times [\text{NO}_3^\bullet] + k_{[\text{species i}+\text{O}_3]} \times [\text{O}_3]} \quad \text{Eqn 7}$$

$$398 [\text{SOA}]_{\text{species,oxidant}} = [\text{species}] \cdot \text{branching ratio}_{\text{species,oxidant}} \cdot \text{yield}_{\text{species,oxidant}} \quad \text{Eqn 8}$$

399 Combining the estimated branching ratio and SOA yield from chamber studies (Eqn 8),  
400 we calculate that  $0.7 \mu\text{g m}^{-3}$  of SOA would be produced (Table S5), which agrees within a factor  
401 of three with measured nighttime LO-OOA production ( $1.7 \mu\text{g m}^{-3}$  from 17:00 to sunrise). Fig.  
402 S12 illustrates our estimated contribution from different oxidation pathway and different VOCs  
403 to nighttime OA production. SOA from biogenic VOCs+ $\text{NO}_3^\bullet$  accounts for about 64% of total  
404 nighttime OA production. Specifically,  $\beta$ -pinene+ $\text{NO}_3^\bullet$  accounts for 80% of OA from the  $\text{NO}_3^\bullet$   
405 oxidation pathway, which corresponds to about 50% of total nighttime OA production.

406

407

408

409

410

411

412

413 **References**

- 414
- 415 1. Canagaratna MR, *et al.* (2007) Chemical and microphysical characterization of ambient aerosols  
416 with the aerodyne aerosol mass spectrometer. *Mass Spectrometry Reviews* 26(2):185-222.
- 417 2. DeCarlo PF, *et al.* (2006) Field-Deployable, High-Resolution, Time-of-Flight Aerosol Mass  
418 Spectrometer. *Anal Chem* 78(24):8281-8289.
- 419 3. Middlebrook AM, Bahreini R, Jimenez JL, & Canagaratna MR (2012) Evaluation of Composition-  
420 Dependent Collection Efficiencies for the Aerodyne Aerosol Mass Spectrometer using Field Data.  
421 *Aerosol Sci Tech* 46(3):258-271.
- 422 4. Orsini DA, *et al.* (2003) Refinements to the particle-into-liquid sampler (PILS) for ground and  
423 airborne measurements of water soluble aerosol composition. *Atmospheric Environment* 37(9-  
424 10):1243-1259.
- 425 5. Hecobian A, *et al.* (2010) Water-Soluble Organic Aerosol material and the light-absorption  
426 characteristics of aqueous extracts measured over the Southeastern United States. *Atmos. Chem.*  
427 *Phys.* 10(13):5965-5977.
- 428 6. Isaacman G, *et al.* (2014) On-line derivatization for hourly measurements of gas- and particle-  
429 phase Semi-Volatile oxygenated organic compounds by Thermal desorption Aerosol Gas  
430 chromatography (SV-TAG). *Atmos. Meas. Tech. Discuss.* 7(7):7495-7529.
- 431 7. Zhao Y, *et al.* (2012) Development of an In Situ Thermal Desorption Gas Chromatography  
432 Instrument for Quantifying Atmospheric Semi-Volatile Organic Compounds. *Aerosol Sci Tech*  
433 47(3):258-266.
- 434 8. Kreisberg NM, *et al.* (2014) Development of an automated high temperature valveless injection  
435 system for on-line gas chromatography. *Atmos. Meas. Tech. Discuss.* 7(7):7531-7567.
- 436 9. Gilman JB, *et al.* (2010) Ozone variability and halogen oxidation within the Arctic and sub-Arctic  
437 springtime boundary layer. *Atmos. Chem. Phys.* 10(21):10223-10236.
- 438 10. Paatero P & Tapper U (1994) Positive Matrix Factorization - a Nonnegative Factor Model with  
439 Optimal Utilization of Error-Estimates of Data Values. *Environmetrics* 5(2):111-126.
- 440 11. Paatero P (1997) A weighted non-negative least squares algorithm for three-way 'PARAFAC'  
441 factor analysis. *Chemometr Intell Lab* 38(2):223-242.
- 442 12. Ulbrich IM, Canagaratna MR, Zhang Q, Worsnop DR, & Jimenez JL (2009) Interpretation of  
443 organic components from Positive Matrix Factorization of aerosol mass spectrometric data.  
444 *Atmos. Chem. Phys.* 9(9):2891-2918.
- 445 13. Ulbrich IM, Canagaratna MR, Zhang Q, Worsnop DR, & Jimenez JL (2009) Interpretation of  
446 organic components from Positive Matrix Factorization of aerosol mass spectrometric data.  
447 *Atmos. Chem. Phys.* 9(9):2891-2918.
- 448 14. Zhang Q, *et al.* (2011) Understanding atmospheric organic aerosols via factor analysis of aerosol  
449 mass spectrometry: a review. *Anal Bioanal Chem* 401(10):3045-3067.
- 450 15. May AA, Saleh R, Hennigan CJ, Donahue NM, & Robinson AL (2012) Volatility of Organic  
451 Molecular Markers Used for Source Apportionment Analysis: Measurements and Implications  
452 for Atmospheric Lifetime. *Environ Sci Technol* 46(22):12435-12444.
- 453 16. Zhao R, Mungall EL, Lee AKY, Aljawhary D, & Abbatt JPD (2014) Aqueous-phase photooxidation  
454 of levoglucosan &ndash; a mechanistic study using aerosol time-of-flight chemical ionization  
455 mass spectrometry (Aerosol ToF-CIMS). *Atmos. Chem. Phys.* 14(18):9695-9706.
- 456 17. Bougiatioti A, *et al.* (2014) Processing of biomass-burning aerosol in the eastern Mediterranean  
457 during summertime. *Atmos. Chem. Phys.* 14(9):4793-4807.



- 458 18. Huang XF, *et al.* (2010) Highly time-resolved chemical characterization of atmospheric  
459 submicron particles during 2008 Beijing Olympic Games using an Aerodyne High-Resolution  
460 Aerosol Mass Spectrometer. *Atmos Chem Phys* 10(18):8933-8945.
- 461 19. Mohr C, *et al.* (2009) Characterization of Primary Organic Aerosol Emissions from Meat Cooking,  
462 Trash Burning, and Motor Vehicles with High-Resolution Aerosol Mass Spectrometry and  
463 Comparison with Ambient and Chamber Observations. *Environ Sci Technol* 43(7):2443-2449.
- 464 20. Robinson AL, Subramanian R, Donahue NM, Bernardo-Bricker A, & Rogge WF (2006) Source  
465 Apportionment of Molecular Markers and Organic Aerosol. 3. Food Cooking Emissions. *Environ*  
466 *Sci Technol* 40(24):7820-7827.
- 467 21. Crippa M, *et al.* (2013) Wintertime aerosol chemical composition and source apportionment of  
468 the organic fraction in the metropolitan area of Paris. *Atmos. Chem. Phys.* 13(2):961-981.
- 469 22. Crippa M, *et al.* (2014) Organic aerosol components derived from 25 AMS data sets across  
470 Europe using a consistent ME-2 based source apportionment approach. *Atmos. Chem. Phys.*  
471 14(12):6159-6176.
- 472 23. Canagaratna MR, *et al.* (2014) Elemental ratio measurements of organic compounds using  
473 aerosol mass spectrometry: characterization, improved calibration, and implications. *Atmos.*  
474 *Chem. Phys. Discuss.* 14(13):19791-19835.
- 475 24. Guo H, *et al.* (2014) Particle water and pH in the southeastern United States. *Atmos. Chem. Phys.*  
476 *Discuss.* 14(19):27143-27193.
- 477 25. Fountoukis C & Nenes A (2007) ISORROPIA II: a computationally efficient thermodynamic  
478 equilibrium model for K<sup>+</sup>-Ca<sup>2+</sup>-Mg<sup>2+</sup>-NH<sub>4</sub><sup>(+)</sup>-Na<sup>+</sup>-SO<sub>4</sub><sup>2-</sup>-NO<sub>3</sub><sup>-</sup>-Cl<sup>-</sup>-H<sub>2</sub>O aerosols. *Atmos Chem*  
479 *Phys* 7(17):4639-4659.
- 480 26. Cerully K, *et al.* (2014) On the Link Between Hygroscopicity, Volatility, and Oxidation State of  
481 Ambient and Water-soluble Aerosol in the Southeastern United States. *Atmos. Chem. Phys.*  
482 *Discuss.* 14, 2014.
- 483 27. Stohl A, Forster C, Frank A, Seibert P, & Wotawa G (2005) Technical note: The Lagrangian  
484 particle dispersion model FLEXPART version 6.2. *Atmos. Chem. Phys.* 5(9):2461-2474.
- 485 28. Farmer DK, *et al.* (2010) Response of an aerosol mass spectrometer to organonitrates and  
486 organosulfates and implications for atmospheric chemistry. *P Natl Acad Sci USA* 107(15):6670-  
487 6675.
- 488 29. Rollins AW, *et al.* (2012) Evidence for NO<sub>x</sub> Control over Nighttime SOA Formation. *Science*  
489 337(6099):1210-1212.
- 490 30. Fry JL, *et al.* (2013) Observations of gas- and aerosol-phase organic nitrates at BEACHON-  
491 RoMBAS 2011. *Atmos Chem Phys* 13(17):8585-8605.
- 492 31. Gaston CJ, Thornton JA, & Ng NL (2014) Reactive uptake of N<sub>2</sub>O<sub>5</sub> to internally mixed inorganic  
493 and organic particles: the role of organic carbon oxidation state and inferred organic phase  
494 separations. *Atmos. Chem. Phys.* 14(11):5693-5707.
- 495 32. Crowley JN, *et al.* (2011) Variable lifetimes and loss mechanisms for NO<sub>3</sub> and N<sub>2</sub>O<sub>5</sub> during the  
496 DOMINO campaign: contrasts between marine, urban and continental air. *Atmos Chem Phys*  
497 11(21):10853-10870.
- 498 33. Saunders SM, Jenkin ME, Derwent RG, & Pilling MJ (2003) Protocol for the development of the  
499 Master Chemical Mechanism, MCM v3 (Part A): tropospheric degradation of non-aromatic  
500 volatile organic compounds. *Atmos Chem Phys* 3:161-180.
- 501 34. Mao J, *et al.* (2012) Insights into hydroxyl measurements and atmospheric oxidation in a  
502 California forest. *Atmos. Chem. Phys.* 12(17):8009-8020.
- 503 35. Ng NL, *et al.* (2008) Secondary organic aerosol (SOA) formation from reaction of isoprene with  
504 nitrate radicals (NO<sub>3</sub>). *Atmos Chem Phys* 8(14):4117-4140.

- 505 36. Kleindienst TE, Lewandowski M, Offenberg JH, Jaoui M, & Edney EO (2007) Ozone-isoprene  
506 reaction: Re-examination of the formation of secondary organic aerosol. *Geophysical Research*  
507 *Letters* 34(1).
- 508 37. Hallquist M, Wängberg I, Ljungström E, Barnes I, & Becker K-H (1999) Aerosol and Product Yields  
509 from NO<sub>3</sub> Radical-Initiated Oxidation of Selected Monoterpenes. *Environ Sci Technol* 33(4):553-  
510 559.
- 511 38. Shilling JE, *et al.* (2008) Particle mass yield in secondary organic aerosol formed by the dark  
512 ozonolysis of alpha-pinene. *Atmos Chem Phys* 8(7):2073-2088.
- 513 39. Griffin RJ, Cocker DR, Flagan RC, & Seinfeld JH (1999) Organic aerosol formation from the  
514 oxidation of biogenic hydrocarbons. *J Geophys Res-Atmos* 104(D3):3555-3567.

515

516

517

518

519

520

521

522

523

524

525

526

527

528

529

530

531

532

533

534 Table S1. Sampling sites and periods for the Southeastern Center of Air Pollution and  
535 Epidemiology (SCAPE) study and the Southern Oxidant and Aerosol Study (SOAS).

536

537

| Site (Abbreviation)        | Sampling Period       |
|----------------------------|-----------------------|
| Jefferson Street (JST_May) | 5/10/2012 - 6/2/2012  |
| Yorkville (YRK_July)       | 6/26/2012 - 7/20/2012 |
| Georgia Tech (GT_Aug)      | 7/20/2012 - 9/4/2012  |
| Jefferson Street (JST_Nov) | 11/6/2012 - 12/4/2012 |
| Yorkville (YRK_Dec)        | 12/5/2012 - 1/10/2013 |
| Roadside site (RS_Jan)     | 1/26/2013 - 2/28/2013 |
| Centreville (CTR_June)     | 6/1/2013 – 7/15/2013  |

538

539

540

541

542

543

544

545

546

547

548

549

550

551

552

553

554

555

556

557

558

559

560 Table S2. Results of multivariate linear regression of the relationship between Isoprene-OA,  
561 particle water ( $\text{H}_2\text{O}_{\text{ptcl}}$ ), particle acidity ( $\text{H}^+$ ), and sulfate ( $\text{SO}_4^{2-}$ ) by using total water (a) and  
562 organic water (b) for the Centreville data.

563 (a)

| Variable                       | $\beta$ -coefficient | Standard error | t Value | P value |
|--------------------------------|----------------------|----------------|---------|---------|
| Intercept                      | 0.267                | 0.094          | 2.82    | 0.0049  |
| [total- $\text{H}_2\text{O}$ ] | -0.004               | 0.008          | -0.50   | 0.6171  |
| $\text{H}^+_{(\text{aq})}$     | 0.009                | 0.048          | 0.18    | 0.8540  |
| $[\text{SO}_4^{2-}]$           | 0.424                | 0.022          | 19.23   | <0.0001 |

564

565 (b)

| Variable                     | $\beta$ -coefficient | Standard error | t Value | P value |
|------------------------------|----------------------|----------------|---------|---------|
| Intercept                    | 0.172                | 0.095          | 1.81    | 0.0707  |
| [Org- $\text{H}_2\text{O}$ ] | 0.005                | 0.016          | 3.10    | 0.0020  |
| $\text{H}^+_{(\text{aq})}$   | 0.043                | 0.047          | 0.92    | 0.3599  |
| $[\text{SO}_4^{2-}]$         | 0.396                | 0.018          | 22.32   | <0.0001 |

566

567

568

569

570

571

572

573

574

575

576

577

578

579 Table S3. The campaign average nighttime concentration of VOCs in Centreville and their  
 580 reaction rate constants (29) used in the calculation of NO<sub>3</sub><sup>\*</sup> reactivity.

| Species                        | Conc.<br>(ppb) | reaction rate constant<br>(cm <sup>3</sup> molec <sup>-1</sup> s <sup>-1</sup> ) | NO <sub>3</sub> <sup>*</sup> reactivity<br>(1/s) |
|--------------------------------|----------------|----------------------------------------------------------------------------------|--------------------------------------------------|
| propene                        | 0.069          | 9.54E-15                                                                         | 1.60E-05                                         |
| isoprene                       | 1.917          | 6.96E-13                                                                         | 3.27E-02                                         |
| propanal                       | 0.080          | 6.31E-15                                                                         | 1.23E-05                                         |
| methacrolein                   | 0.385          | 3.40E-15                                                                         | 3.21E-05                                         |
| n-butanal                      | 0.024          | 1.10E-14                                                                         | 6.61E-06                                         |
| ethylbenzene                   | 0.008          | 1.50E-12                                                                         | 3.08E-04                                         |
| m- and p-xylenes               | 0.019          | 3.80E-16                                                                         | 1.81E-07                                         |
| o-xylene                       | 0.009          | 3.80E-16                                                                         | 8.01E-08                                         |
| α-pinene                       | 0.350          | 6.21E-12                                                                         | 5.34E-02                                         |
| camphene                       | 0.058          | 2.51E-12                                                                         | 3.56E-03                                         |
| 1-ethyl-3- and 4-methylbenzene | 0.035          | 6.60E-16                                                                         | 5.66E-07                                         |
| β-pinene                       | 0.312          | 2.51E-12                                                                         | 1.92E-02                                         |
| 1,3,5-trimethylbenzene         | 0.007          | 8.80E-16                                                                         | 1.59E-07                                         |
| myrcene                        | 0.009          | 1.28E-11                                                                         | 2.72E-03                                         |
| 1,2-dimethyl-4-ethylbenzene    | 0.007          | 1.80E-15                                                                         | 3.23E-07                                         |
| limonene                       | 0.050          | 1.22E-11                                                                         | 1.48E-02                                         |
| p-cymene                       | 0.021          | 9.90E-16                                                                         | 5.01E-07                                         |

581  
 582  
 583  
 584  
 585  
 586  
 587  
 588  
 589  
 590  
 591  
 592

593 Table S4: Estimated reaction branching ratio of isoprene,  $\alpha$ -pinene, and  $\beta$ -pinene with respect to  
594 different oxidants for the Centreville data.

| Species          | Conc. <sup>a</sup><br>(ppb) | Rate Constant<br>(cm <sup>3</sup> molec <sup>-1</sup> s <sup>-1</sup> ) <sup>b</sup> |                | Branching Ratio              |                |
|------------------|-----------------------------|--------------------------------------------------------------------------------------|----------------|------------------------------|----------------|
|                  |                             | NO <sub>3</sub> <sup>•</sup>                                                         | O <sub>3</sub> | NO <sub>3</sub> <sup>•</sup> | O <sub>3</sub> |
| Isoprene         | 1.92                        | 6.96E-13                                                                             | 1.27E-17       | 0.167                        | 0.833          |
| $\alpha$ -pinene | 0.35                        | 6.21E-12                                                                             | 9.00E-17       | 0.202                        | 0.798          |
| $\beta$ -pinene  | 0.32                        | 2.51E-12                                                                             | 1.50E-17       | 0.380                        | 0.620          |

595

596 <sup>a</sup> Campaign average nighttime (20:00-5:00 local time) concentration in Centreville.

597 <sup>b</sup> Rate constants are from the Master Chemical Mechanism (<http://mcm.leeds.ac.uk/MCM/>)  
598 under 25°C, which is typical nighttime temperature in Centreville.

599

600

601

602

603

604

605

606

607

608

609

610

611

612

613

614

615

616 Table S5: Estimated nighttime SOA production from isoprene,  $\alpha$ -pinene, and  $\beta$ -pinene from  
617 various oxidation pathways in Centreville.

| Species          | SOA yield from literature* |                    | [SOA] ( $\mu\text{g m}^{-3}$ ) |              |
|------------------|----------------------------|--------------------|--------------------------------|--------------|
|                  | $\text{NO}_3^\cdot$        | $\text{O}_3$       | $\text{NO}_3^\cdot$            | $\text{O}_3$ |
| Isoprene         | 0.10 <sup>†</sup>          | 0 <sup>‡</sup>     | 0.089                          | 0.000        |
| $\alpha$ -pinene | 0.007 <sup>¶</sup>         | 0.15 <sup>  </sup> | 0.003                          | 0.232        |
| $\beta$ -pinene  | 0.55 <sup>**</sup>         | 0.03 <sup>††</sup> | 0.371                          | 0.033        |

618

619 \* SOA yields at mass loadings relevant to Centreville (i.e.,  $\sim 8 \mu\text{g m}^{-3}$ )

620 <sup>†</sup> Ng et al. 2008 (Expt on 8/14/07 in Table 1) (35)

621 <sup>‡</sup> Kleindienst et al. 2007 (36)

622 <sup>¶</sup> Hallquist et al. 1999 (18ppb initial  $\alpha$ -pinene in Table 1) (37)

623 <sup>||</sup> Shilling et al. 2008 (Estimate from Fig. 3) (38)

624 <sup>\*\*</sup> Results from laboratory chamber experiments conducted in the current study.

625 <sup>††</sup> Griffin et al. 1999 (Expt 6/11/98a in Table 2b) (39)

626

627

628

629

630

631

632

633

634

635

636

637

638 Fig. S1: Diurnal trends of temperature (bottom plot), relative humidity (RH, middle plot), and  
639 boundary layer height (BLH, top plot) for the Centreville data. The upper and lower boundaries  
640 of the shaded area represent 75 and 25 percentiles. The line within the shaded area marks the  
641 median value.

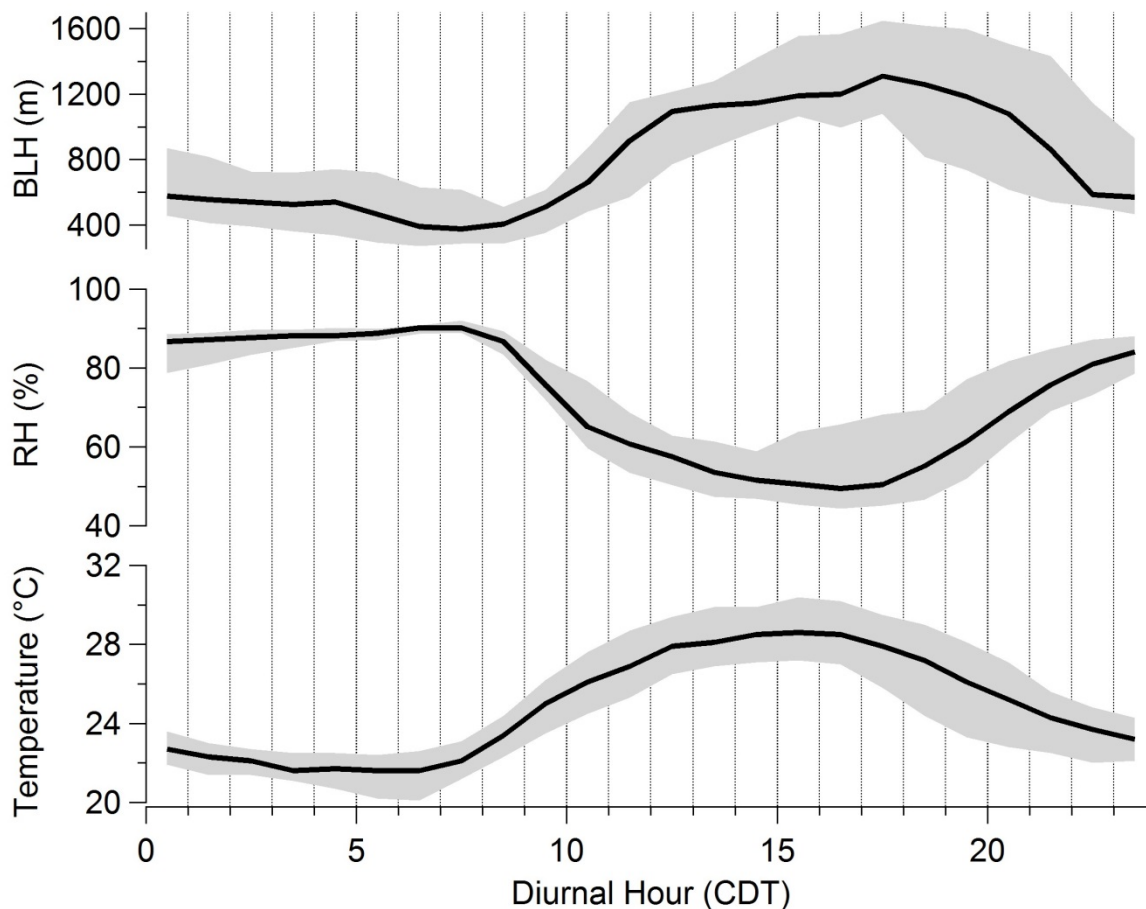

642  
643  
644  
645  
646  
647  
648  
649



650 Fig. S2: Time series (a) and diurnal trend (b) of organics (OA), sulfate ( $\text{SO}_4^{2-}$ ), nitrate ( $\text{NO}_3^-$ ),  
 651 ammonium ( $\text{NH}_4^+$ ), and chloride ( $\text{Cl}^-$ ) as measured by HR-ToF-AMS in Centreville. Inset of (a)  
 652 shows the campaign average composition. Panel (c) shows the normalized mass spectrum of OA  
 653 (colored by ion type). The median values are reported in the diurnal trends.

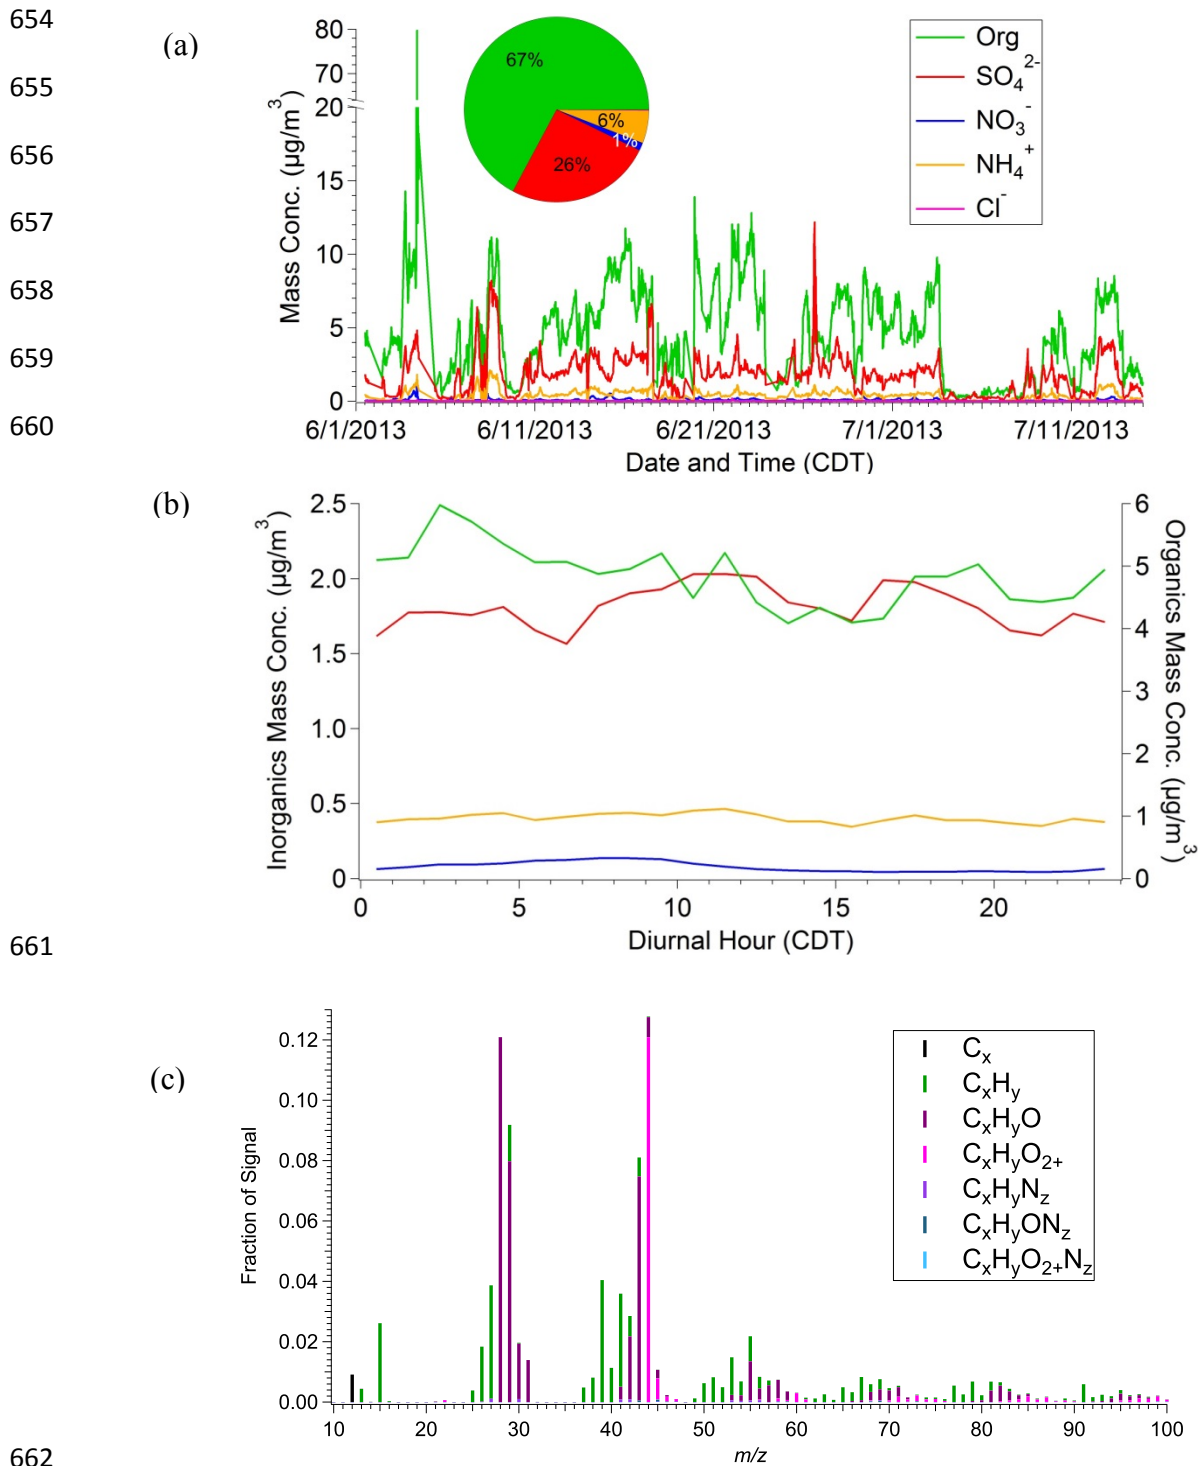

663 Fig. S3. Summary of key diagnostic plots of the PMF results for the Centreville data. (a)  $Q/Q_{\text{exp}}$   
 664 as a function of number of factors. (b)  $Q/Q_{\text{exp}}$  as a function of FPEAK for the 4-factor solution.  
 665 (c) Mass fraction of PMF factors as a function of FPEAK. (d) Correlations of time series and  
 666 mass spectra among PMF factors. (e) The distribution of scaled residuals for each  $m/z$ . The boxes  
 667 represent  $\pm 25\%$  of points. (f) Time series of the measured and the reconstructed organic mass. (g)  
 668 Variations of the residual (= measured - reconstructed) of the least-square-fit as a function of  
 669 time. (h) The  $Q/Q_{\text{exp}}$  for each point as a function of time. (i) The  $Q/Q_{\text{exp}}$  values for each  $m/z$ .

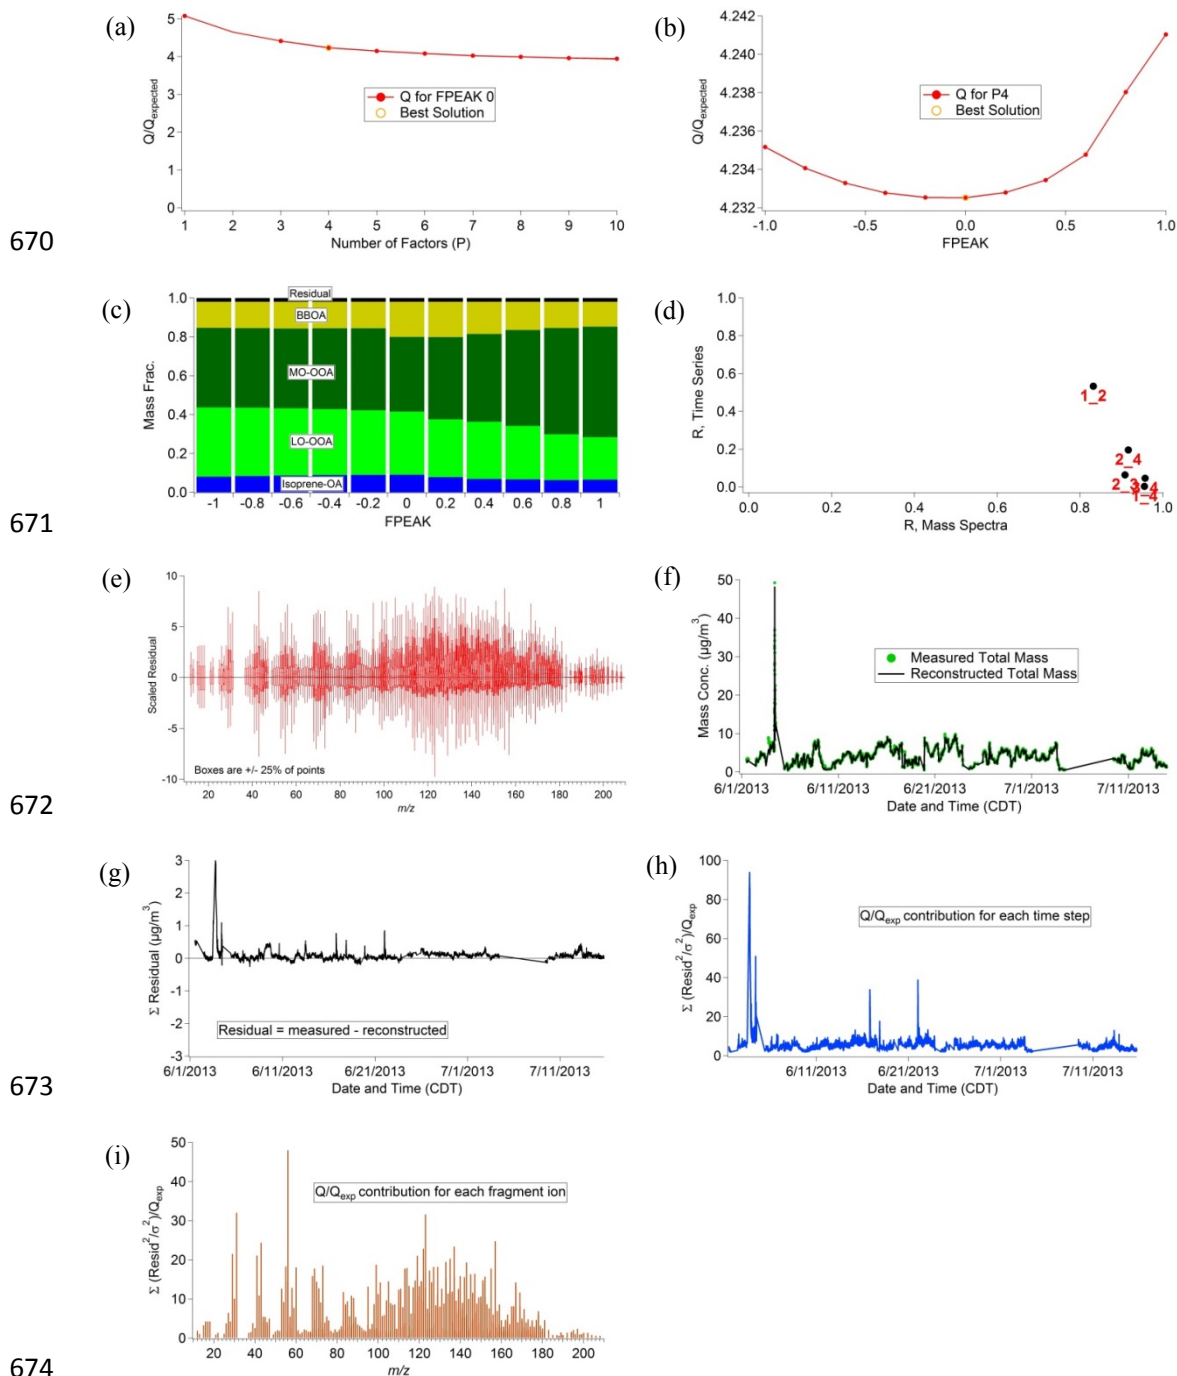

675 Fig. S4. The diurnal trends of isoprene,  $\alpha$ -pinene,  $\beta$ -pinene, Isoprene-OA, and LO-OOA factor  
676 for the Centreville data. The median values are reported.

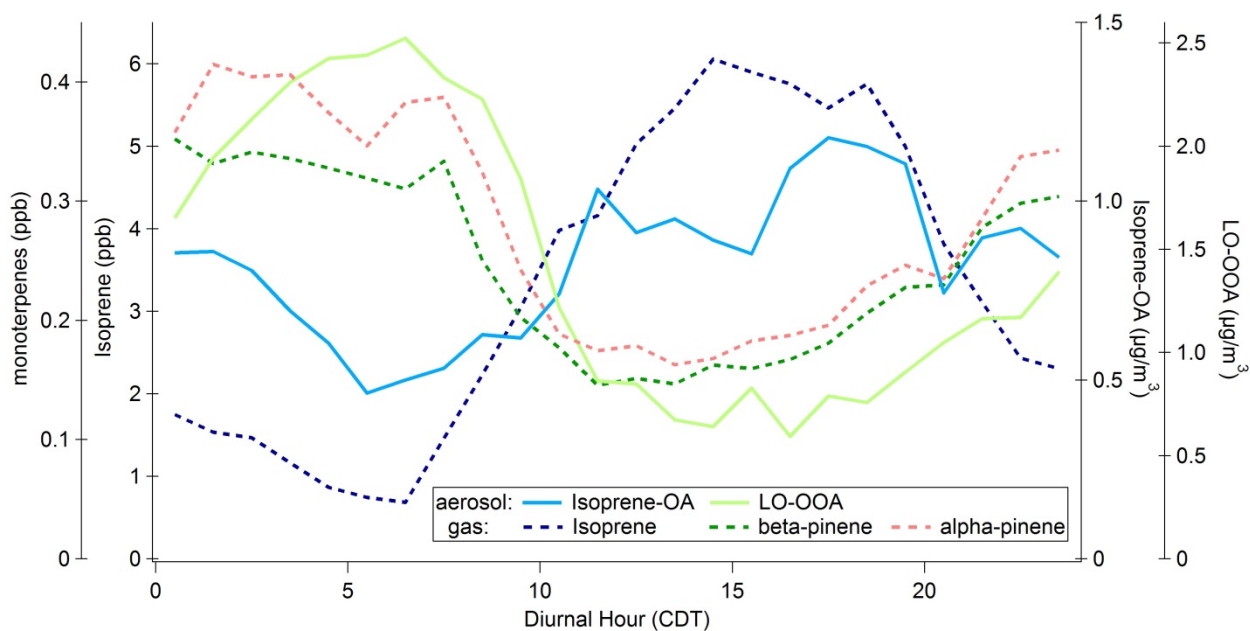

677

678

679

680

681

682

683 Fig. S5. The time series of Isoprene-OA, LO-OOA, MO-OOA, and sulfate ( $\text{SO}_4^{2-}$ ) in Yorkville  
684 July, 2012. Isoprene-OA correlates well with  $\text{SO}_4^{2-}$  ( $R=0.85$ ). The black box indicates the period  
685 when sulfate concentration decreased dramatically (from 22:30 July 5 to 16:30 July 6).

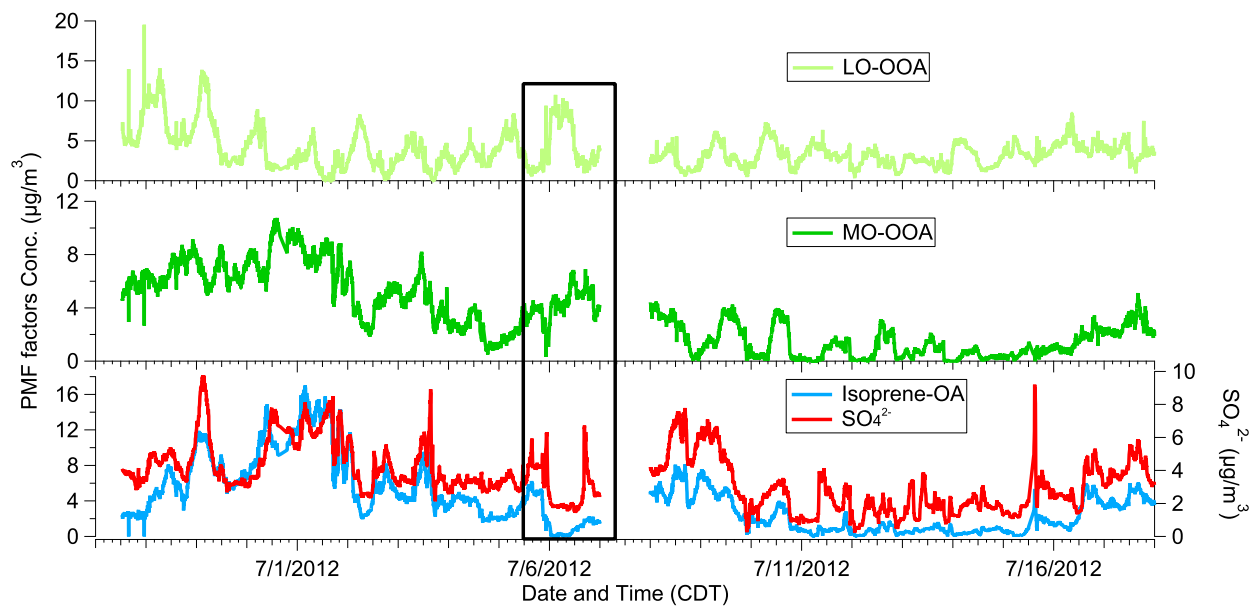

686  
687  
688  
689  
690  
691  
692  
693  
694  
695  
696  
697  
698  
699

700 Fig. S6. Relationship between particle water ( $H_2O_{\text{ptcl}}$ ), particle acidity ( $H^+$ ), sulfate ( $SO_4^{2-}$ ), and  
 701 Isoprene-OA for Centreville (a) and three SCAPE datasets (b, c, d), where isoprene-OA factor is  
 702 resolved. For Centreville, data points are colored by gas-phase  $[NH_3]$ , which is measured by  
 703 Chemical Ionization Mass Spectrometer (CIMS).

704 (a) Centreville

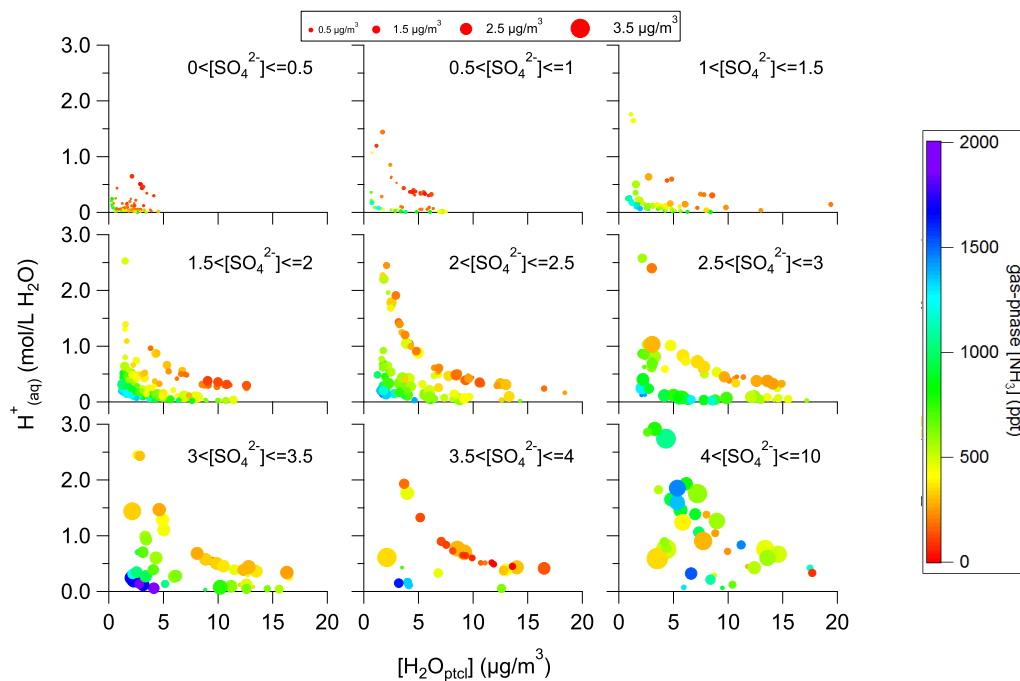

705

706 (b) Jefferson Street (JST\_May)

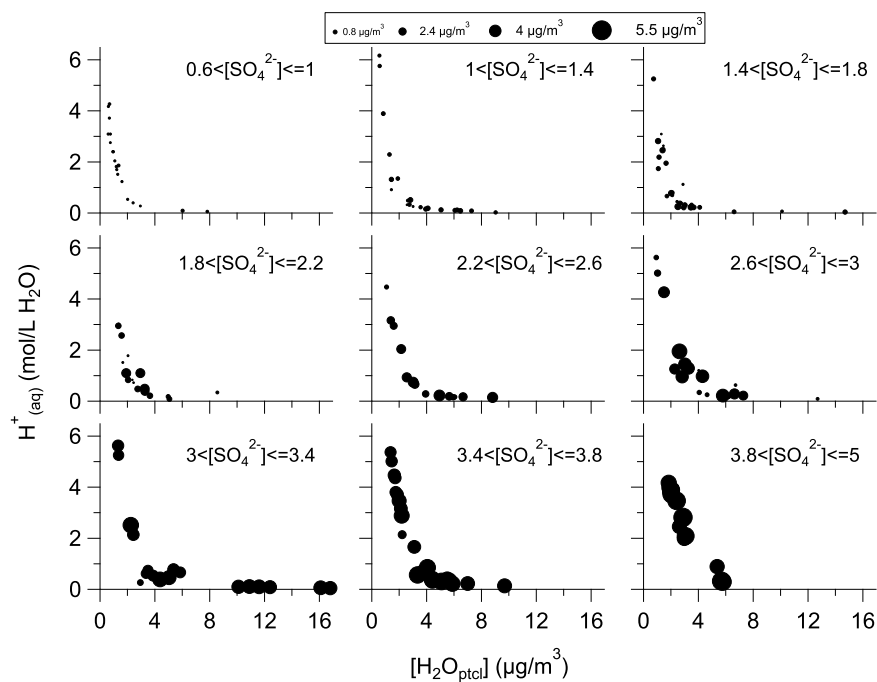

707

708 (c) Yorkville (YRK\_July)

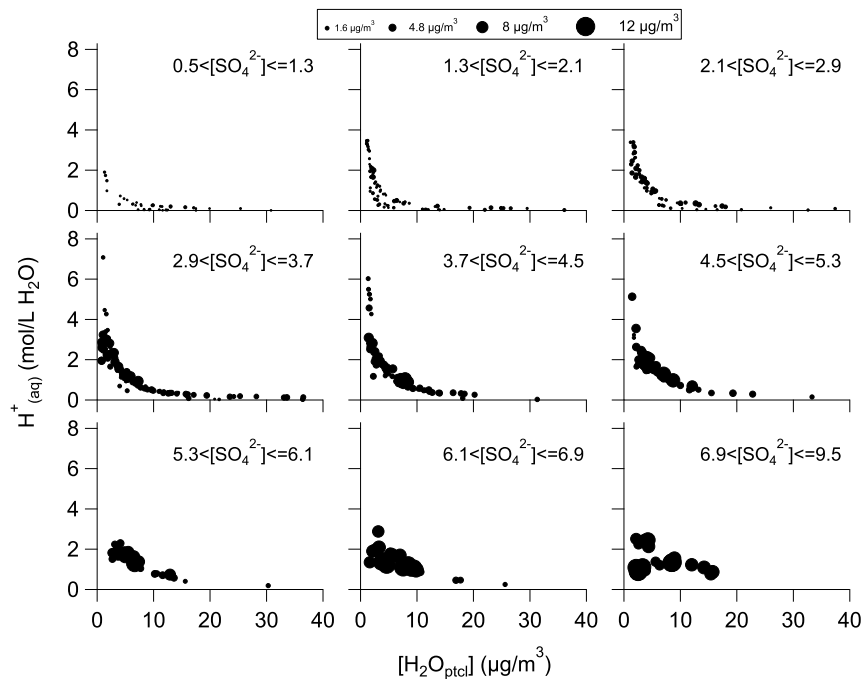

709

710 (d) Georgia Tech (GT\_Aug)

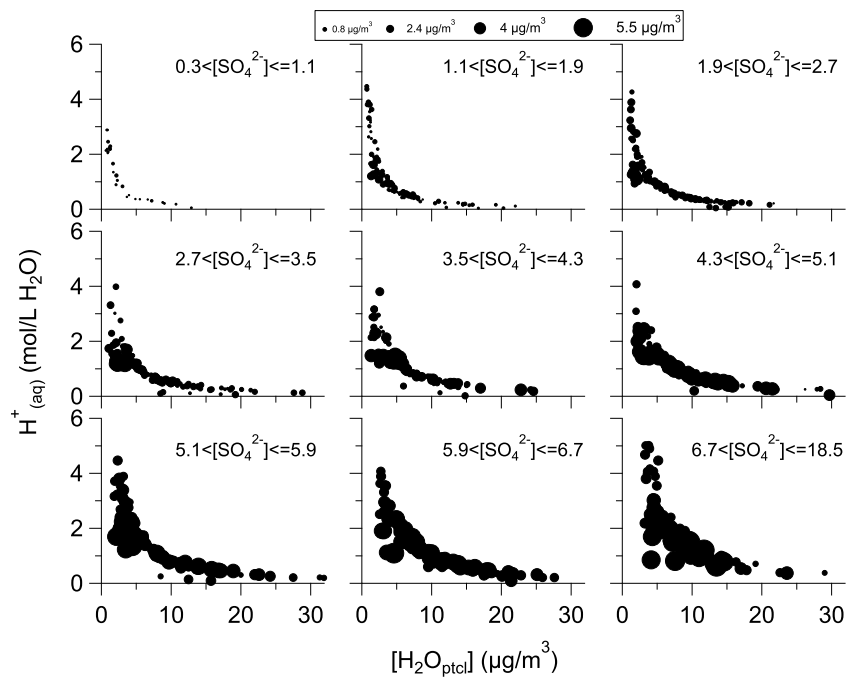

711

712

713 Fig. S7. Diurnal trends of  $\text{H}_2\text{O}_{\text{ptcl}}$  mass concentration ( $\mu\text{g m}^{-3}$  air)  
714 concentration ( $\text{mol L}^{-1} \text{H}_2\text{O}$ ) in Centreville. The upper and lower boundaries of the shaded area  
715 represent 75 and 25 percentiles. The line within the shaded area marks the median value.

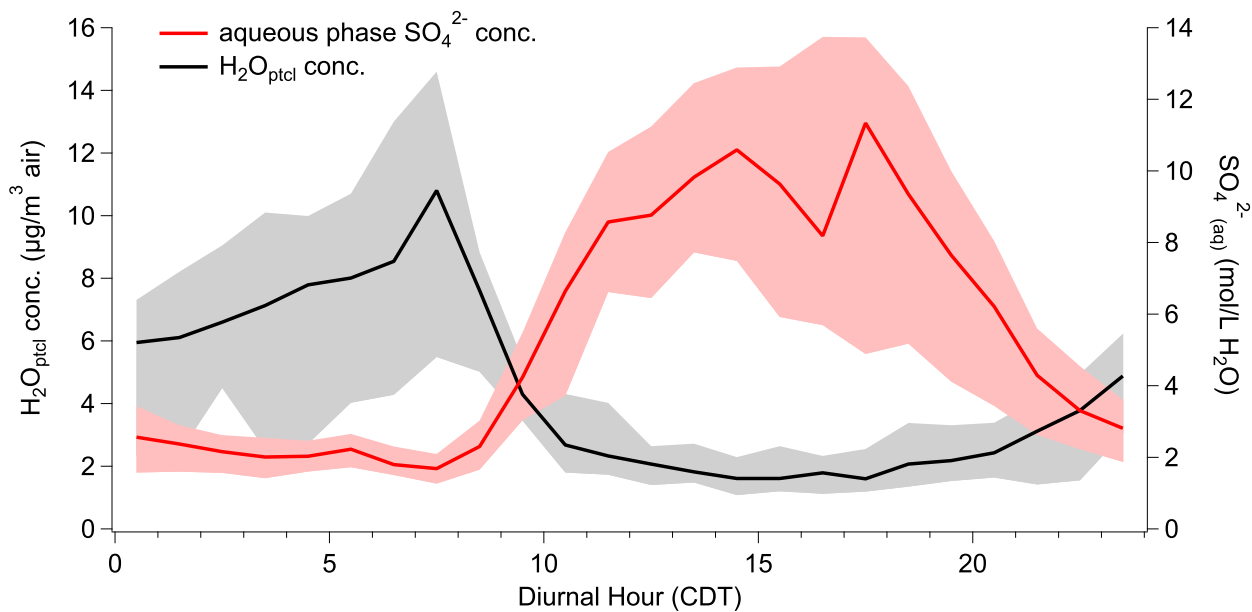

716  
717  
718  
719  
720  
721  
722  
723  
724  
725  
726  
727  
728  
729  
730

731 Fig. S8. The diurnal trends of the LO-OOA factor for Centreville and all SCAPE datasets. The  
732 diurnal trends are normalized by the highest LO-OOA concentration of each dataset.  
733 Abbreviations correspond to Centreville (CTR), Yorkville (YRK), Jefferson Street (JST),  
734 Georgia Institute of Technology (GT), and Roadside (RS).

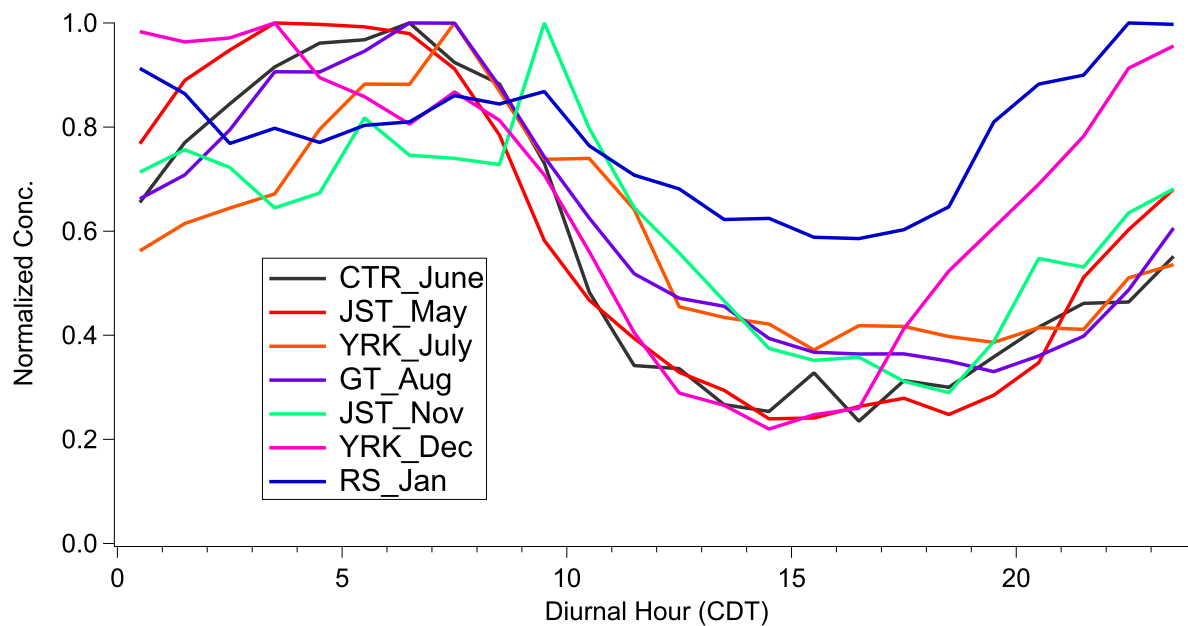

735

736



737 Fig. S9. Source regions of air masses sampled in Centreville during the SOAS campaign. Shown  
738 are residence times calculated by FLEXPART, integrated vertically and over the duration of the  
739 campaign (2013-06-01 00:00 to 2013-07-14 21:00 UTC time). Particles (representing an inert  
740 tracer only affected by advection, turbulence and convection) were released in Centreville every  
741 3 hours and followed back in time for 72 hours. Areas delineated by dashed lines (NE, NW, SE,  
742 SW) indicate the regions used in determining air mass origin.

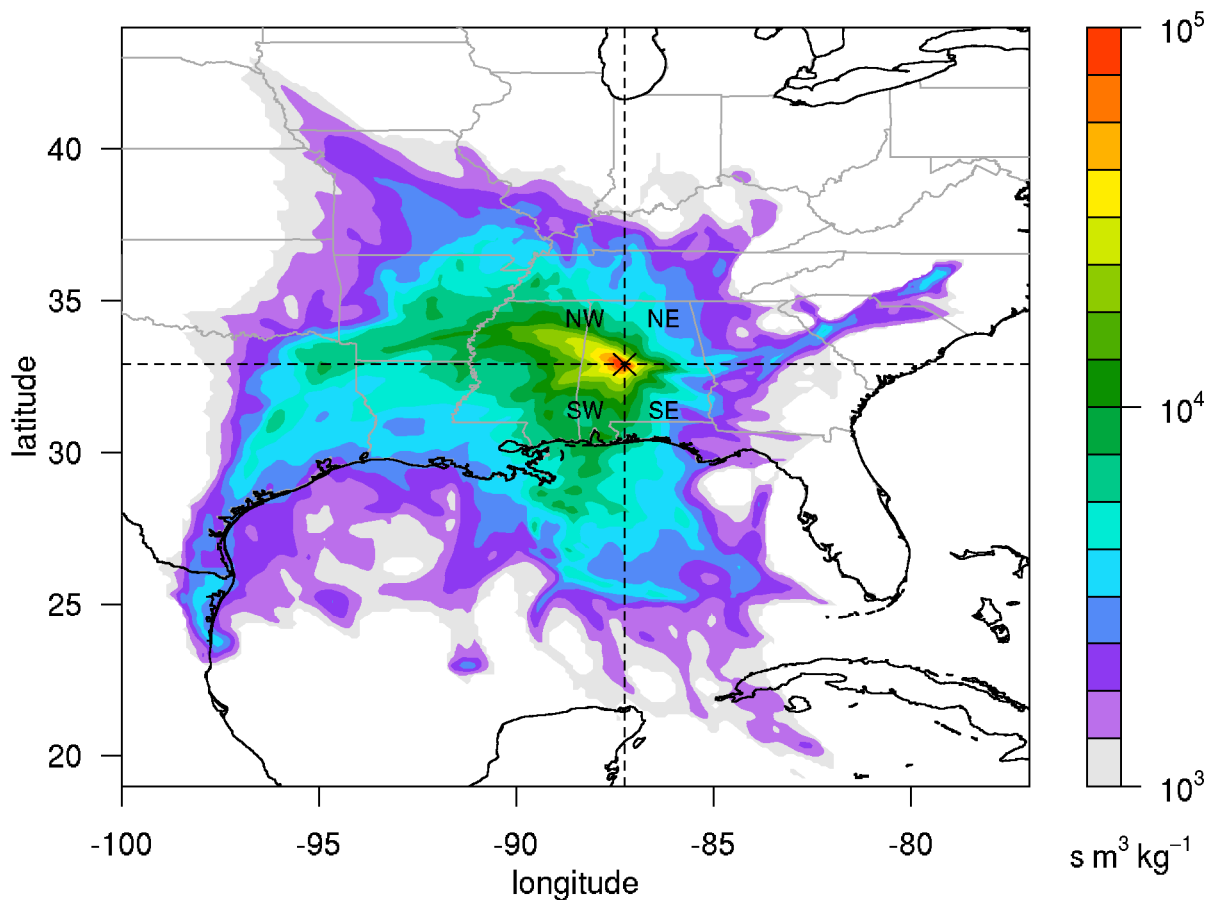

743  
744  
745  
746  
747  
748  
749

750 Fig. S10. (a) Frequency of air masses origin as a function of diurnal hour at Centreville.  
 751 Abbreviations correspond to Northwest (NW), Northeast (NE), Southwest (SW), and Southeast  
 752 (SE). (b) Grouped diurnal trend of LO-OOA (b) and Isoprene-OA (c) based on the origins of air  
 753 masses. The upper and lower boundaries of the shaded area represent 75 and 25 percentiles.  
 754 The line within the shaded area marks the median value.

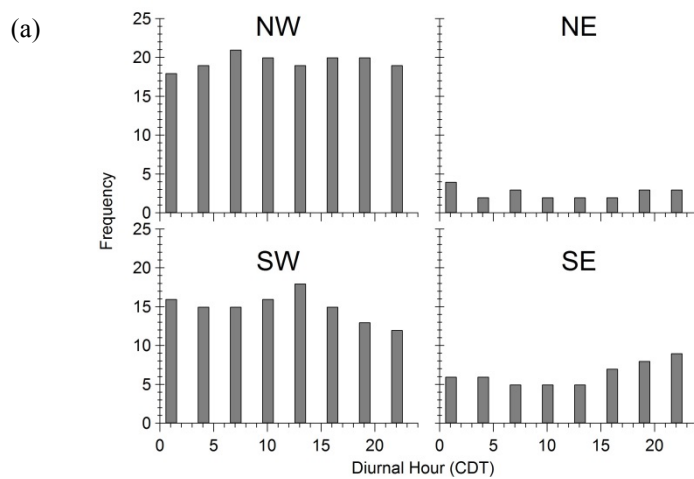

755

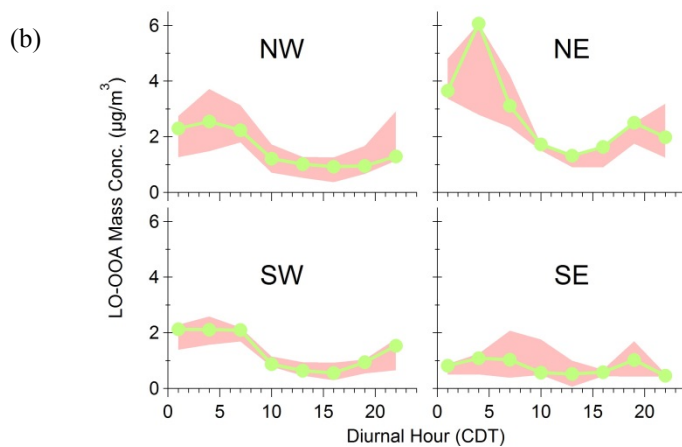

756

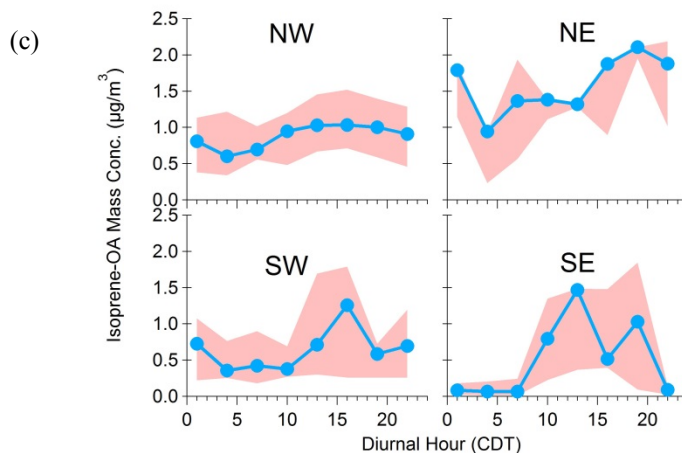

757

758 Fig. S11. Estimated contribution of organic nitrates to LO-OOA.

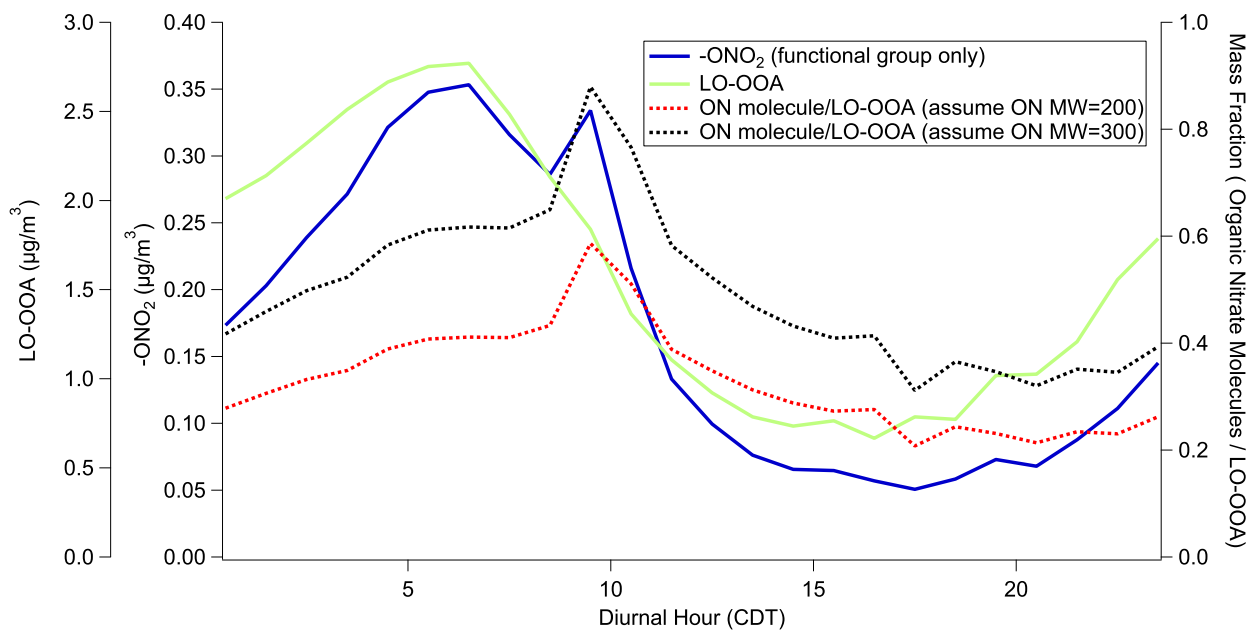

759

760

761

762

763

764

765

766

767 Fig. S12. Estimated nighttime contribution to LO-OOA through different oxidation pathways  
768 and different SOA precursors in Centreville.

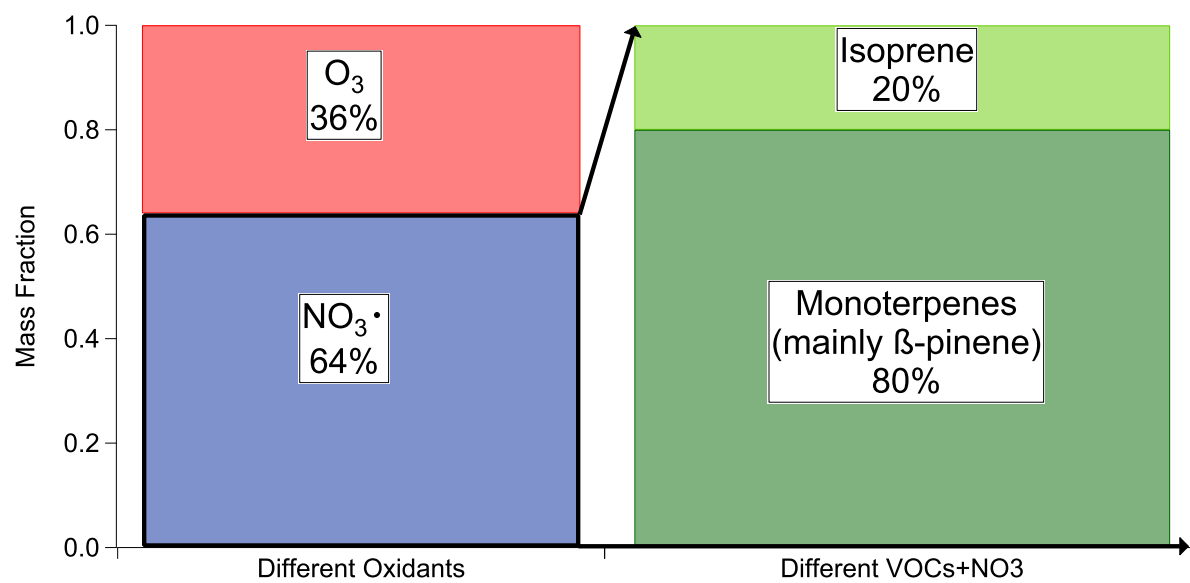

769  
770  
771  
772  
773  
774  
775  
776  
777  
778  
779  
780  
781  
782  
783

784 Fig S13: Seasonal variation of correlation coefficient (R) between OC and sulfate at Centreville  
785 site from 2006 to 2010.

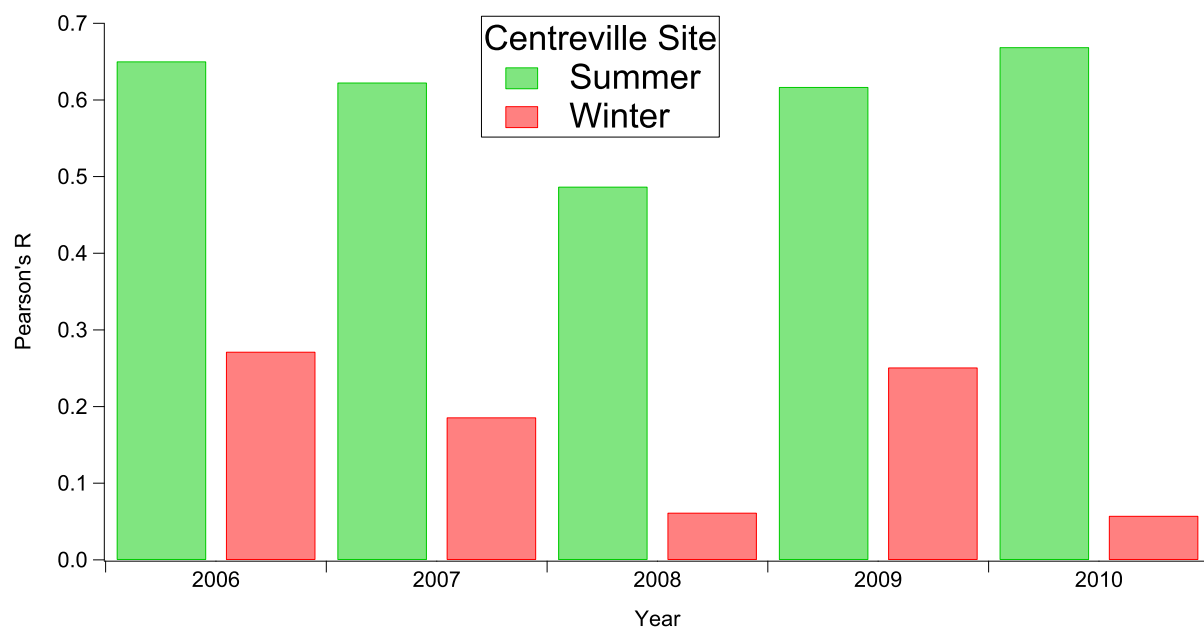

786

787

788

789
